# Supplementary material
Source: PubMed Central journal article supplement (PMC3501198)
Supplement: NIHMS419286-supplement-Suppl__Tables_and_Figures.pdf [file NIHMS419286-supplement-Suppl__Tables_and_Figures.pdf]

## **SUPPLEMENTARY INFORMATION**

**Title:** Tumor Suppressor BRCA1 epigenetically controls oncogenic miRNA-155

**Authors:** Suhwan Chang, Rui-Hong Wang, Keiko Akagi, Kyung-Ae Kim, Betty K. Martin, Luca Cavallone, kConFab, Diana C. Haines, Mark Basik, Phuong Mai, Elizabeth Poggi, Claudine Isaacs, Lai M. Looi, Kein S. Mun, Mark H. Greene, Stephen W. Byers, Soo H. Teo, Chu-Xia Deng and Shyam K. Sharan.

Supplementary Table 1

## Expression analysis of R1699Q embryoid bodies

| Column #              | Probeset ID        | Gene Title                                              | Gene Symbol      |
|-----------------------|--------------------|---------------------------------------------------------|------------------|
| <b>Down-regulated</b> |                    |                                                         |                  |
|                       | 33597 1449289_a_at | beta-2 microglobulin                                    | B2m              |
|                       | 36731 1452428_a_at | beta-2 microglobulin                                    | B2m              |
|                       | 39742 1455439_a_at | lectin, galactose binding, soluble 1                    | Lgals1           |
|                       | 44651 1460351_at   | S100 calcium binding protein A11 (calgizzarin)          | S100a11          |
|                       | 6821 1422507_at    | cystatin B                                              | Cstb             |
|                       | 40559 1456256_at   | eukaryotic translation initiation factor 5              | Eif5             |
|                       | 6820 1422506_a_at  | cystatin B                                              | Cstb             |
|                       | 7743 1423429_at    | reproductive homeobox 5                                 | Rhox5            |
|                       | 378 1416039_x_at   | cysteine rich protein 61                                | Cyr61            |
|                       | 11440 1427126_at   | heat shock protein 1B                                   | Hspa1b           |
|                       | 3912 1419573_a_at  | lectin, galactose binding, soluble 1                    | Lgals1           |
|                       | 11441 1427127_x_at | heat shock protein 1B                                   | Hspa1b           |
|                       | 32541 1448233_at   | prion protein                                           | Prnp             |
|                       | 12397 1428083_at   | RIKEN cDNA 2310043N10 gene                              | 2310043N10Ril    |
|                       | 22447 1438133_a_at | cysteine rich protein 61                                | Cyr61            |
|                       | 8372 1424058_at    | proline-rich coiled-coil 1                              | Prrc1            |
|                       | 7262 1422948_s_at  | histone cluster 1, H4h /// histone cluster 1, H4c /// h | Hist1h4a /// His |
|                       | 30331 1446017_at   | Transcribed locus                                       | ---              |
|                       | 3648 1419309_at    | podoplanin                                              | Pdpn             |
|                       | 24568 1440254_at   | hypothetical protein LOC100041277 /// hypothetica       | LOC100041277     |
|                       | 3430 1419091_a_at  | annexin A2                                              | Anxa2            |
|                       | 238 1415899_at     | Jun-B oncogene                                          | Junb             |
|                       | 2910 1418571_at    | tumor necrosis factor receptor superfamily, memb        | Tnfrsf12a        |
|                       | 43825 1459522_s_at | glycogenin                                              | Gyg              |
|                       | 33295 1448987_at   | acyl-Coenzyme A dehydrogenase, long-chain               | Acadl            |
|                       | 34232 1449929_at   | dynein light chain Tctex-type 3                         | Dynlt3           |
|                       | 44614 1460314_s_at | histone cluster 2, H3c1 /// histone cluster 2, H2aa1    | Hist1h3a /// His |
|                       | 32626 1448318_at   | adipose differentiation related protein                 | Adfp             |
|                       | 44157 1459854_s_at | dynein light chain Tctex-type 3                         | Dynlt3           |
|                       | 2911 1418572_x_at  | tumor necrosis factor receptor superfamily, memb        | Tnfrsf12a        |
|                       | 36621 1452318_a_at | heat shock protein 1B                                   | Hspa1b           |
|                       | 18817 1434503_s_at | lysosomal-associated membrane protein 2                 | Lamp2            |
|                       | 12408 1428094_at   | lysosomal-associated membrane protein 2                 | Lamp2            |
|                       | 1101 1416762_at    | S100 calcium binding protein A10 (calpactin)            | S100a10          |
|                       | 21485 1437171_x_at | gelsolin                                                | Gsn              |
|                       | 38321 1454018_at   | tousled-like kinase 2 (Arabidopsis)                     | Tlk2             |
|                       | 1748 1417409_at    | Jun oncogene                                            | Jun              |
|                       | 32647 1448339_at   | transmembrane protein 30A                               | Tmem30a          |
|                       | 12017 1427703_at   | platelet-activating factor acetylhydrolase, isoform     | LOC100046589     |
|                       | 23286 1438972_x_at | RIKEN cDNA 2810410L24 gene                              | 2810410L24Ril    |

## Up-regulated

|  |                    |                                                   |               |
|--|--------------------|---------------------------------------------------|---------------|
|  | 34929 1450626_at   | mannosidase, beta A, lysosomal                    | Manba         |
|  | 40644 1456341_a_at | Kruppel-like factor 9 /// RIKEN cDNA 2310051E17 g | 2310051E17Ril |

|       |              |                                                               |                |
|-------|--------------|---------------------------------------------------------------|----------------|
| 12602 | 1428288_at   | RIKEN cDNA 2310051E17 gene                                    | 2310051E17Ril  |
| 35156 | 1450853_at   | transducin-like enhancer of split 4, homolog of DrcTle4       |                |
| 491   | 1416152_a_at | splicing factor, arginine/serine-rich 3 (SRp20)               | Sfrs3          |
| 34385 | 1450082_s_at | ets variant gene 5                                            | Etv5           |
| 19231 | 1434917_at   | cordon-bleu                                                   | Cobl           |
| 12366 | 1428052_a_at | zinc finger, MYM domain containing 1                          | Zmym1          |
| 33716 | 1449408_at   | junction adhesion molecule 2                                  | Jam2           |
| 36761 | 1452458_s_at | peptidylprolyl isomerase (cyclophilin) like 5                 | Ppil5          |
| 12603 | 1428289_at   | Kruppel-like factor 9 /// RIKEN cDNA 2310051E17 g             | 2310051E17Ril  |
| 12456 | 1428142_at   | ets variant gene 5                                            | Etv5           |
| 2099  | 1417760_at   | nuclear receptor subfamily 0, group B, member 1               | Nr0b1          |
| 5312  | 1420998_at   | ets variant gene 5                                            | Etv5           |
| 18103 | 1433789_at   | small nucleolar RNA host gene (non-protein coding)            | Snhg3          |
| 33065 | 1448757_at   | promyelocytic leukemia                                        | Pml            |
| 4412  | 1420085_at   | fibroblast growth factor 4                                    | Fgf4           |
| 33423 | 1449115_at   | metal response element binding transcription factor           | Mtf2           |
| 36643 | 1452340_at   | RIKEN cDNA 6820424L24 gene                                    | 6820424L24Ril  |
| 21240 | 1436926_at   | estrogen related receptor, beta                               | Esrrb          |
| 20097 | 1435783_at   | RIKEN cDNA B230112C05 gene                                    | B230112C05Ri   |
| 490   | 1416151_at   | splicing factor, arginine/serine-rich 3 (SRp20)               | Sfrs3          |
| 4413  | 1420086_x_at | fibroblast growth factor 4                                    | Fgf4           |
| 7383  | 1423069_at   | activity-dependent neuroprotective protein                    | Adnp           |
| 2773  | 1418434_at   | makorin, ring finger protein, 1                               | Mkrn1          |
| 12533 | 1428219_at   | RING1 and YY1 binding protein /// predicted gene,             | EG628746 /// R |
| 11408 | 1427094_at   | polymerase (DNA directed), epsilon 2 (p59 subunit             | Pole2          |
| 41001 | 1456698_s_at | heterogeneous nuclear ribonucleoprotein D-like                | Hnrpdl         |
| 4882  | 1420568_at   | stimulated by retinoic acid gene 8                            | Stra8          |
| 24054 | 1439740_s_at | uridine-cytidine kinase 2                                     | Uck2           |
| 33198 | 1448890_at   | Kruppel-like factor 2 (lung)                                  | Klf2           |
| 6600  | 1422286_a_at | TG interacting factor 1                                       | Tgif1          |
| 39296 | 1454993_a_at | splicing factor, arginine/serine-rich 3 (SRp20)               | Sfrs3          |
| 36340 | 1452037_at   | mannoside acetylglucosaminyltransferase 2                     | Mgat2          |
| 32792 | 1448484_at   | S-adenosylmethionine decarboxylase 1                          | Amd1           |
| 4420  | 1420093_s_at | heterogeneous nuclear ribonucleoprotein D-like                | Hnrpdl         |
| 36352 | 1452049_at   | ribosomal protein L7-like 1                                   | Rpl7l1         |
| 8072  | 1423758_at   | GTPase activating protein (SH3 domain) binding p              | G3bp2          |
| 17884 | 1433570_s_at | MAK10 homolog, amino-acid N-acetyltransferase s               | Mak10          |
| 12508 | 1428194_at   | ubiquitin specific peptidase 9, X chromosome                  | Usp9x          |
| 19071 | 1434757_at   | core-binding factor, runt domain, alpha subunit 2, 1          | Cbfa2t2        |
| 19315 | 1435001_at   | phospholipase A2, activating protein                          | Plaa           |
| 2840  | 1418501_a_at | oxidation resistance 1                                        | Oxr1           |
| 39603 | 1455300_at   | RIKEN cDNA E130014J05 gene                                    | E130014J05Ril  |
| 14034 | 1429720_at   | MAK10 homolog, amino-acid N-acetyltransferase s               | Mak10          |
| 890   | 1416551_at   | ATPase, Ca <sup>++</sup> transporting, cardiac muscle, slow t | Atp2a2         |
| 33418 | 1449110_at   | ras homolog gene family, member B                             | Rheb           |
| 7011  | 1422697_s_at | jumonji, AT rich interactive domain 2                         | Jarid2         |
| 1743  | 1417404_at   | ELOVL family member 6, elongation of long chain               | Elovl6         |
| 17828 | 1433514_at   | ethanolamine kinase 1                                         | Etnk1          |
| 13039 | 1428725_at   | protein inhibitor of activated STAT 2                         | Pias2          |

|       |              |                                                      |                |
|-------|--------------|------------------------------------------------------|----------------|
| 13760 | 1429446_at   | serologically defined colon cancer antigen 1         | Sdccag1        |
| 8830  | 1424516_at   | RIKEN cDNA B230354K17 gene                           | B230354K17Ri   |
| 516   | 1416177_at   | RNA binding motif protein, X chromosome retroge      | Rbmxt          |
| 21424 | 1437110_at   | RIKEN cDNA 2810474O19 gene                           | 2810474O19Ri   |
| 35588 | 1451285_at   | fusion, derived from t(12;16) malignant liposarcom   | Fus            |
| 11456 | 1427142_s_at | jumonji, AT rich interactive domain 1B (Rbp2 like)   | Jarid1b        |
| 24695 | 1440381_at   | RIKEN cDNA 2410085M17 gene                           | 2410085M17Ri   |
| 34341 | 1450038_s_at | ubiquitin specific peptidase 9, X chromosome         | Usp9x          |
| 38920 | 1454617_at   | arrestin domain containing 3                         | Arrdc3         |
| 20072 | 1435758_at   | similar to Beta-1,4-galactosyltransferase 6 (Beta-1, | LOC675709      |
| 5848  | 1421534_at   | deafness, autosomal dominant 5 homolog (human        | Dfna5h         |
| 36    | 1415697_at   | GTPase activating protein (SH3 domain) binding p     | G3bp2          |
| 19811 | 1435497_at   | RIKEN cDNA 5730590G19 gene /// hypothetical pro      | 5730590G19Ri   |
| 1361  | 1417022_at   | solute carrier family 7 (cationic amino acid transpc | Slc7a3         |
| 40522 | 1456219_at   | similar to OPR                                       | LOC10004598    |
| 13159 | 1428845_at   | BCL2-associated transcription factor 1               | Bclaf1         |
| 11214 | 1426900_at   | jumonji domain containing 1C                         | Jmjd1c         |
| 35017 | 1450714_at   | antizyme inhibitor 1                                 | Azin1          |
| 19078 | 1434764_at   | A kinase (PRKA) anchor protein 11                    | Akap11         |
| 19019 | 1434705_at   | C-terminal binding protein 2                         | Ctbp2          |
| 13697 | 1429383_at   | casein kinase 1, gamma 3 /// similar to casein kina  | Csnk1g3 /// LO |
| 2409  | 1418070_at   | chromodomain protein, Y chromosome-like              | Cdyl           |
| 35013 | 1450710_at   | jumonji, AT rich interactive domain 2                | Jarid2         |
| 12507 | 1428193_at   | ubiquitin specific peptidase 9, X chromosome         | Usp9x          |
| 5236  | 1420922_at   | ubiquitin specific peptidase 9, X chromosome         | Usp9x          |
| 11036 | 1426722_at   | solute carrier family 38, member 2                   | Slc38a2        |
| 10852 | 1426538_a_at | transformation related protein 53                    | Trp53          |
| 11485 | 1427171_at   | rearranged L-myc fusion sequence                     | Rif            |
| 39025 | 1454722_at   | phosphatase and tensin homolog                       | Pten           |
| 12538 | 1428224_at   | heterogeneous nuclear ribonucleoprotein D-like       | Hnrpdl         |
| 18913 | 1434599_a_at | tight junction protein 2                             | Tjp2           |
| 501   | 1416162_at   | RAD21 homolog (S. pombe)                             | Rad21          |
| 18217 | 1433903_at   | expressed sequence AU021838                          | AU021838       |
| 14948 | 1430634_a_at | phosphofructokinase, platelet                        | Pfcp           |
| 8347  | 1424033_at   | splicing factor, arginine/serine-rich 7              | Sfrs7          |
| 19508 | 1435194_at   | heat shock protein 4                                 | Hspa4          |
| 25996 | 1441682_s_at | exportin, tRNA (nuclear export receptor for tRNAs)   | Xpot           |
| 19081 | 1434767_at   | expressed sequence C79407                            | C79407         |
| 18626 | 1434312_at   | ADP-ribosylation factor 6                            | Arf6           |
| 44138 | 1459835_s_at | DnaJ (Hsp40) homolog, subfamily A, member 1          | Dnaja1         |
| 35288 | 1450985_a_at | tight junction protein 2                             | Tjp2           |
| 34356 | 1450053_at   | Kinesin family member 2A                             | Kif2a          |
| 34355 | 1450052_at   | kinesin family member 2A                             | Kif2a          |
| 39655 | 1455352_at   | expressed sequence AU023006                          | AU023006       |
| 8829  | 1424515_at   | RIKEN cDNA B230354K17 gene                           | B230354K17Ri   |
| 11562 | 1427248_at   | Wolf-Hirschhorn syndrome candidate 2 (human)         | Whsc2          |
| 13086 | 1428772_at   | exportin, tRNA (nuclear export receptor for tRNAs)   | Xpot           |
| 12053 | 1427739_a_at | transformation related protein 53                    | Trp53          |
| 13197 | 1428883_at   | transmembrane protein 57                             | Tmem57         |

|       |              |                                                       |                |
|-------|--------------|-------------------------------------------------------|----------------|
| 7738  | 1423424_at   | zinc finger protein of the cerebellum 3               | Zic3           |
| 9037  | 1424723_s_at | cleavage stimulation factor, 3' pre-RNA, subunit 3    | Cstf3          |
| 39476 | 1455173_at   | G1 to S phase transition 1                            | Gspt1          |
| 1267  | 1416928_at   | RNA binding motif protein 12                          | Rbm12          |
| 39077 | 1454774_at   | zinc finger protein 445                               | Zfp445         |
| 34993 | 1450690_at   | RAN binding protein 2                                 | Ranbp2         |
| 8667  | 1424353_at   | leucine-rich PPR-motif containing                     | Lrpprc         |
| 36540 | 1452237_at   | HIV-1 Rev binding protein                             | Hrb            |
| 12263 | 1427949_at   | zinc finger protein 294                               | Zfp294         |
| 13902 | 1429588_at   | RIKEN cDNA 2810474O19 gene                            | 2810474O19Ri   |
| 42677 | 1458374_at   | expressed sequence C79407                             | C79407         |
| 13762 | 1429448_s_at | CXXC finger 6                                         | Cxxc6          |
| 18050 | 1433736_at   | host cell factor C1                                   | Hcfc1          |
| 8061  | 1423747_a_at | pyruvate dehydrogenase kinase, isoenzyme 1            | Pdk1           |
| 18995 | 1434681_at   | RIKEN cDNA 4932441K18 gene                            | 4932441K18Ri   |
| 18616 | 1434302_at   | Ras association (RalGDS/AF-6) and pleckstrin hom      | Raph1          |
| 3793  | 1419454_x_at | protein inhibitor of activated STAT 2                 | Pias2          |
| 21381 | 1437067_at   | putative homeodomain transcription factor 2           | Phtf2          |
| 33017 | 1448709_at   | AT rich interactive domain 1A (Swi1 like) /// similar | Arid1a /// LOC |
| 18108 | 1433794_at   | senataxin                                             | Setx           |
| 40406 | 1456103_at   | promyelocytic leukemia                                | Pml            |
| 40308 | 1456005_a_at | BCL2-like 11 (apoptosis facilitator)                  | Bcl2l11        |
| 2987  | 1418648_at   | EGL nine homolog 3 (C. elegans)                       | Egln3          |
| 34340 | 1450037_at   | ubiquitin specific peptidase 9, X chromosome          | Usp9x          |
| 6578  | 1422264_s_at | Kruppel-like factor 9 /// RIKEN cDNA 2310051E17 g     | 2310051E17Ri   |
| 20284 | 1435970_at   | nemo like kinase /// similar to nemo-like kinase      | LOC100044468   |
| 18351 | 1434037_s_at | p300/CBP-associated factor                            | Pcaf           |
| 32538 | 1448230_at   | ubiquitin specific peptidase 10                       | Usp10          |
| 18914 | 1434600_at   | tight junction protein 2                              | Tjp2           |
| 20882 | 1436568_at   | junction adhesion molecule 2                          | Jam2           |
| 13609 | 1429295_s_at | thyroid hormone receptor interactor 13                | Trip13         |
| 567   | 1416228_at   | protein (peptidyl-prolyl cis/trans isomerase) NIMA-   | Pin1           |
| 9300  | 1424986_s_at | F-box and WD-40 domain protein 7, archipelago hc      | Fbxw7          |
| 19092 | 1434778_at   | Transcribed locus                                     | ---            |
| 869   | 1416530_a_at | purine-nucleoside phosphorylase /// similar to puri   | LOC100045567   |
| 28704 | 1444390_at   | PR domain containing 14                               | Prdm14         |
| 44480 | 1460179_at   | DnaJ (Hsp40) homolog, subfamily A, member 1           | Dnaja1         |
| 11457 | 1427143_at   | jumonji, AT rich interactive domain 1B (Rbp2 like)    | Jarid1b        |
| 22057 | 1437743_at   | AE binding protein 2                                  | Aebp2          |
| 44978 | 1460678_at   | kelch domain containing 2                             | Klhdc2         |
| 7028  | 1422714_at   | ubiquitin-conjugating enzyme E2I /// predicted gene   | EG546265 /// U |
| 17993 | 1433679_at   | far upstream element (FUSE) binding protein 3         | Fubp3          |
| 36512 | 1452209_at   | plakophilin 4                                         | Pkp4           |
| 12845 | 1428531_at   | integrator complex subunit 7                          | Ints7          |
| 33393 | 1449085_at   | PHD finger protein 10                                 | Phf10          |
| 1306  | 1416967_at   | SRY-box containing gene 2                             | Sox2           |
| 111   | 1415772_at   | nucleolin                                             | Ncl            |
| 40267 | 1455964_at   | Cdc2-related kinase, arginine/serine-rich             | Crkrs          |
| 11648 | 1427334_s_at | RIKEN cDNA 2810474O19 gene                            | 2810474O19Ri   |

|       |              |                                                        |                |
|-------|--------------|--------------------------------------------------------|----------------|
| 38969 | 1454666_at   | similar to BKLF                                        | LOC100046851   |
| 6166  | 1421852_at   | potassium channel, subfamily K, member 5               | Kcnk5          |
| 33285 | 1448977_at   | transcription factor AP-2, gamma                       | Tcfap2c        |
| 259   | 1415920_at   | cleavage stimulation factor, 3' pre-RNA subunit 2, 1   | Cstf2t         |
| 31938 | 1447624_s_at | storkhead box 2                                        | Stox2          |
| 14048 | 1429734_at   | RIKEN cDNA 4632434I11 gene                             | 4632434I11Rik  |
| 35359 | 1451056_at   | proteasome (prosome, macropain) 26S subunit, nc        | Psmd7          |
| 13312 | 1428998_at   | PHD finger protein 3                                   | Phf3           |
| 19079 | 1434765_at   | E1A binding protein p300                               | Ep300          |
| 47    | 1415708_at   | taurine upregulated gene 1                             | Tug1           |
| 36741 | 1452438_s_at | TAF4A RNA polymerase II, TATA box binding protei       | LOC100046931   |
| 23051 | 1438737_at   | zinc finger protein of the cerebellum 3                | Zic3           |
| 21141 | 1436827_at   | gene model 944, (NCBI)                                 | Gm944          |
| 2979  | 1418640_at   | sirtuin 1 ((silent mating type information regulator   | Sirt1          |
| 7012  | 1422698_s_at | jumonji, AT rich interactive domain 2                  | Jarid2         |
| 11067 | 1426753_at   | PHD finger protein 17                                  | Phf17          |
| 35762 | 1451459_at   | AT hook containing transcription factor 1              | Ahctf1         |
| 8099  | 1423785_at   | EGL nine homolog 1 (C. elegans)                        | Egln1          |
| 7428  | 1423114_at   | ubiquitin-conjugating enzyme E2D 3 (UBC4/5 hom         | Ube2d3         |
| 32568 | 1448260_at   | ubiquitin carboxy-terminal hydrolase L1                | Uchl1          |
| 39066 | 1454763_at   | ankyrin repeat domain 17                               | Ankrd17        |
| 20329 | 1436015_s_at | serine/threonine kinase 4                              | Stk4           |
| 18610 | 1434296_at   | cDNA sequence BC049349                                 | BC049349       |
| 40420 | 1456117_at   | ribosomal RNA processing 1 homolog B (S. cerevisi      | Rrp1b          |
| 9172  | 1424858_at   | L-2-hydroxyglutarate dehydrogenase                     | L2hgdh         |
| 4254  | 1419927_s_at | RAB interacting factor                                 | Rabif          |
| 44629 | 1460329_at   | similar to Beta-1,4-galactosyltransferase 6 (Beta-1,   | LOC675709      |
| 2246  | 1417907_at   | ubiquitin-conjugating enzyme E2L 3                     | Ube2l3         |
| 17983 | 1433669_at   | A kinase (PRKA) anchor protein 8                       | Akap8          |
| 40814 | 1456511_x_at | ES cell-expressed Ras                                  | Eras           |
| 39799 | 1455496_at   | phosphoribosylformylglycinamide synthase (FG           | Pfas           |
| 39134 | 1454831_at   | forkhead box N2                                        | Foxn2          |
| 19658 | 1435344_at   | RIKEN cDNA 1110029I05 gene /// hypothetical prote      | 1110029I05Rik  |
| 12721 | 1428407_at   | heterogeneous nuclear ribonucleoprotein A0             | Hnrpa0         |
| 36579 | 1452276_at   | SWI/SNF-related, matrix-associated actin-depende       | Smarcaad1      |
| 2410  | 1418071_s_at | chromodomain protein, Y chromosome-like                | Cdyl           |
| 2853  | 1418514_at   | metal response element binding transcription fact      | Mtf2           |
| 18171 | 1433857_at   | FAT tumor suppressor homolog 1 (Drosophila)            | Fat1           |
| 22603 | 1438289_a_at | SMT3 suppressor of mif two 3 homolog 1 (yeast)         | Sumo1          |
| 10761 | 1426447_at   | nucleoporin 35                                         | Nup35          |
| 33188 | 1448880_at   | ubiquitin-conjugating enzyme E2L 3                     | Ube2l3         |
| 19334 | 1435020_at   | serologically defined colon cancer antigen 1           | Sdccag1        |
| 6372  | 1422058_at   | nodal                                                  | Nodal          |
| 1961  | 1417622_at   | solute carrier family 12, member 2 /// similar to sol  | LOC100047237   |
| 32548 | 1448240_at   | membrane-bound transcription factor peptidase, s       | Mbtps1         |
| 18826 | 1434512_x_at | splicing factor, arginine/serine-rich 3 (SRp20) /// pr | EG632248 /// S |
| 10967 | 1426653_at   | minichromosome maintenance deficient 3 (S. cere        | LOC100045677   |
| 2280  | 1417941_at   | N-acetylneuraminic acid phosphatase                    | Nanp           |
| 35380 | 1451077_at   | ribosomal protein L5 /// similar to ribosomal protei   | EG665407 /// E |

|       |              |                                                        |              |
|-------|--------------|--------------------------------------------------------|--------------|
| 13657 | 1429343_at   | RNA binding motif protein, X-linked-like 2 /// simila  | LOC100046435 |
| 6770  | 1422456_at   | N-ethylmaleimide sensitive fusion protein              | Nsf          |
| 39259 | 1454956_at   | ribosomal protein S6 kinase, polypeptide 1             | Rps6kb1      |
| 21236 | 1436922_at   | peptidylprolyl isomerase (cyclophilin) like 5          | Ppil5        |
| 19167 | 1434853_x_at | makorin, ring finger protein, 1                        | Mkrn1        |
| 19788 | 1435474_at   | TAF5 RNA polymerase II, TATA box binding protein       | Taf5         |
| 40918 | 1456615_a_at | bromodomain PHD finger transcription factor            | Bptf         |
| 2620  | 1418281_at   | RAD51 homolog (S. cerevisiae)                          | Rad51        |
| 12948 | 1428634_at   | TWIST neighbor                                         | Twistnb      |
| 19683 | 1435369_at   | FAST kinase domains 5                                  | Fastkd5      |
| 422   | 1416083_at   | zinc finger, AN1-type domain 5 /// similar to zinc fin | LOC100047896 |
| 8225  | 1423911_at   | protein phosphatase 2, regulatory subunit B (B56),     | LOC100046393 |
| 3333  | 1418994_at   | RIKEN cDNA 2410116G06 gene                             | 2410116G06Ri |
| 39122 | 1454819_at   | ---                                                    | ---          |
| 1494  | 1417155_at   | v-myc myelocytomatosis viral related oncogene, n       | Mycn         |
| 18280 | 1433966_x_at | asparagine synthetase                                  | Asns         |
| 19281 | 1434967_at   | zinc finger, SWIM domain containing 6                  | Zswim6       |
| 37136 | 1452833_at   | Rap guanine nucleotide exchange factor (GEF) 2         | Rapgef2      |
| 35200 | 1450897_at   | Rho GTPase activating protein 5                        | Arhgap5      |
| 32985 | 1448677_at   | COX4 neighbor                                          | Cox4nb       |
| 6371  | 1422057_at   | nodal                                                  | Nodal        |
| 18531 | 1434217_at   | RIKEN cDNA C330019G07 gene                             | C330019G07Ri |
| 4724  | 1420410_at   | nuclear receptor subfamily 5, group A, member 2        | Nr5a2        |
| 19256 | 1434942_at   | ESF1, nucleolar pre-rRNA processing protein, hom       | Esf1         |
| 18353 | 1434039_at   | amyloid beta precursor protein (cytoplasmic tail) b    | Appbp2       |
| 12683 | 1428369_s_at | Rho GTPase activating protein 21                       | Arhgap21     |
| 3754  | 1419415_a_at | retinoic acid receptor, gamma                          | Rarg         |
| 20706 | 1436392_s_at | transcription factor AP-2, gamma                       | Tcfap2c      |
| 17841 | 1433527_at   | iron responsive element binding protein 2              | Ireb2        |
| 22592 | 1438278_a_at | cDNA sequence BC003993                                 | BC003993     |
| 10665 | 1426351_at   | heat shock protein 1 (chaperonin)                      | Hspd1        |
| 40118 | 1455815_a_at | tyrosine 3-monooxygenase/tryptophan 5-monooxy          | Ywhab        |
| 21609 | 1437295_at   | protein kinase N2                                      | Pkn2         |
| 10942 | 1426628_at   | transmembrane protein 34                               | Tmem34       |
| 20092 | 1435778_at   | ankyrin repeat domain 11                               | Ankrd11      |
| 5637  | 1421323_a_at | GTPase activating protein (SH3 domain) binding p       | G3bp2        |
| 2322  | 1417983_a_at | ubiquitin-conjugating enzyme E2 variant 2              | Ube2v2       |
| 1094  | 1416755_at   | DnaJ (Hsp40) homolog, subfamily B, member 1            | Dnajb1       |
| 8187  | 1423873_at   | LSM1 homolog, U6 small nuclear RNA associated (Lsm1    | Lsm1         |
| 8543  | 1424229_at   | dual-specificity tyrosine-(Y)-phosphorylation regul    | Dyrk3        |
| 39251 | 1454948_at   | ubiquitin specific peptidase 7                         | Usp7         |
| 17835 | 1433521_at   | ankyrin repeat domain 13c                              | Ankrd13c     |
| 5266  | 1420952_at   | Son cell proliferation protein                         | Son          |
| 33525 | 1449217_at   | caspase 8 associated protein 2                         | Casp8ap2     |
| 18996 | 1434682_at   | zinc finger protein 770                                | Zfp770       |
| 8802  | 1424488_a_at | pyrophosphatase (inorganic) 2 /// similar to Pyroph    | LOC100048145 |
| 6926  | 1422612_at   | hexokinase 2 /// hypothetical protein                  | LOC10004341  |
| 11398 | 1427084_a_at | mitogen-activated protein kinase kinase kinase kin     | Map4k5       |
| 18148 | 1433834_at   | membrane-associated ring finger (C3HC4) 6              | 6-Mar        |

|       |              |                                                                |              |
|-------|--------------|----------------------------------------------------------------|--------------|
| 32452 | 1448144_at   | heterogeneous nuclear ribonucleoprotein A/B                    | Hnrpab       |
| 26722 | 1442408_at   | sulfatase 2                                                    | Sulf2        |
| 6045  | 1421731_a_at | flap structure specific endonuclease 1                         | Fen1         |
| 12785 | 1428471_at   | sorbin and SH3 domain containing 1                             | Sorbs1       |
| 35620 | 1451317_at   | YTH domain family 2                                            | Ythdf2       |
| 1384  | 1417045_at   | BH3 interacting domain death agonist                           | Bid          |
| 18835 | 1434521_at   | regulatory factor X domain containing 2 homolog (LOC100048616) |              |
| 38960 | 1454657_s_at | MAK10 homolog, amino-acid N-acetyltransferase s                | Mak10        |
| 38419 | 1454116_a_at | MTERF domain containing 1                                      | Mterfd1      |
| 18352 | 1434038_at   | DnaJ (Hsp40) homolog, subfamily C, member 13                   | Dnajc13      |
| 13120 | 1428806_at   | casein kinase 1, gamma 1                                       | Csnk1g1      |
| 40824 | 1456521_at   | nuclear receptor subfamily 5, group A, member 2                | Nr5a2        |
| 1742  | 1417403_at   | ELOVL family member 6, elongation of long chain                | Elovl6       |
| 17851 | 1433537_at   | RIKEN cDNA 4833408C14 gene                                     | 4833408C14Ri |
| 35161 | 1450858_a_at | ubiquitin-conjugating enzyme E2D 3 (UBC4/5 hom                 | Ube2d3       |
| 11194 | 1426880_at   | enhancer trap locus 4                                          | Etl4         |
| 18193 | 1433879_a_at | RIKEN cDNA C130032J12 gene                                     | C130032J12Ri |
| 6798  | 1422484_at   | cytochrome c, somatic                                          | Cycc         |
| 459   | 1416120_at   | ribonucleotide reductase M2                                    | Rrm2         |
| 21662 | 1437348_at   | F-box protein 28                                               | Fbxo28       |
| 408   | 1416069_at   | phosphofructokinase, platelet                                  | Pfkb         |
| 2241  | 1417902_at   | solute carrier family 19 (thiamine transporter), mem           | Slc19a2      |
| 33900 | 1449592_at   | transcription factor 15                                        | Tcf15        |
| 23134 | 1438820_at   | ring finger protein 17                                         | Rnf17        |
| 19314 | 1435000_at   | G1 to S phase transition 1                                     | Gspt1        |
| 19554 | 1435240_at   | bromodomain adjacent to zinc finger domain, 2B                 | Baz2b        |
| 772   | 1416433_at   | replication protein A2                                         | Rpa2         |
| 11096 | 1426782_at   | G protein-coupled receptor 125                                 | Gpr125       |
| 19384 | 1435070_at   | AE binding protein 2                                           | Aebp2        |
| 39117 | 1454814_s_at | expressed sequence AU021838                                    | AU021838     |
| 1254  | 1416915_at   | mutS homolog 6 (E. coli)                                       | Msh6         |
| 19454 | 1435140_at   | insulin degrading enzyme                                       | Ide          |
| 35589 | 1451286_s_at | fusion, derived from t(12;16) malignant liposarcom             | Fus          |
| 6359  | 1422045_a_at | protein tyrosine phosphatase, non-receptor type 1              | Ptpn12       |
| 35944 | 1451641_at   | debranching enzyme homolog 1 (S. cerevisiae)                   | Dbr1         |
| 37017 | 1452714_at   | tetratricopeptide repeat, ankyrin repeat and coiled            | Tanc1        |
| 1505  | 1417166_at   | PC4 and SFRS1 interacting protein 1                            | Psip1        |
| 19697 | 1435383_x_at | necdin                                                         | Ndn          |
| 23379 | 1439065_x_at | Predicted gene, OTTMUSG00000010173                             | OTTMUSG0000  |
| 35754 | 1451451_at   | grancalcin                                                     | Gca          |
| 8215  | 1423901_at   | thyroid hormone receptor interactor 12                         | Trip12       |
| 35383 | 1451080_at   | ubiquitin specific peptidase 1                                 | Usp1         |
| 264   | 1415925_a_at | nucleoporin 62                                                 | Nup62        |
| 3360  | 1419021_at   | mcf.2 transforming sequence                                    | Mcf2         |
| 21054 | 1436740_at   | similar to p47 protein                                         | LOC100041567 |
| 23071 | 1438757_at   | RIKEN cDNA C130069I09 gene /// similar to crooke               | C130069I09Ri |
| 627   | 1416288_at   | DnaJ (Hsp40) homolog, subfamily A, member 1                    | Dnaja1       |
| 33019 | 1448711_at   | minichromosome maintenance deficient 3 (S. cere                | Mcm3ap       |
| 11899 | 1427585_at   | DNA cytosine methyltransferase mRNA                            | ---          |



|       |              |                                                                        |                           |
|-------|--------------|------------------------------------------------------------------------|---------------------------|
| 7589  | 1423275_at   | integrator complex subunit 6                                           | Ints6                     |
| 8195  | 1423881_at   | SAPS domain family, member 3                                           | Saps3                     |
| 22406 | 1438092_x_at | H2A histone family, member Z                                           | H2afz                     |
| 44902 | 1460602_at   | deleted in liver cancer 1                                              | Dlc1                      |
| 18534 | 1434220_at   | nucleoporin 98                                                         | Nup98                     |
| 11012 | 1426698_a_at | heterogeneous nuclear ribonucleoprotein M                              | Hnrpm                     |
| 2109  | 1417770_s_at | proteasome (prosome, macropain) 26S subunit, ATPsmc6                   | ATPsmc6                   |
| 472   | 1416133_at   | RIKEN cDNA C920006C10 gene                                             | C920006C10Ri              |
| 18875 | 1434561_at   | additional sex combs like 1 (Drosophila)                               | Asxl1                     |
| 40893 | 1456590_x_at | aldo-keto reductase family 1, member B3 (aldose reductase)             | Akr1b3                    |
| 32435 | 1448127_at   | ribonucleotide reductase M1                                            | Rrm1                      |
| 12777 | 1428463_a_at | protein phosphatase 2, regulatory subunit B (B56), Ppp2r5e             | Ppp2r5e                   |
| 16356 | 1432042_a_at | smu-1 suppressor of mec-8 and unc-52 homolog (C. elegans)              | Smu1                      |
| 8327  | 1424013_at   | eukaryotic translation termination factor 1                            | Etf1                      |
| 36483 | 1452180_at   | PHD finger protein 17                                                  | Phf17                     |
| 17910 | 1433596_at   | DnaJ (Hsp40) homolog, subfamily C, member 6                            | Dnajc6                    |
| 19255 | 1434941_s_at | ESF1, nucleolar pre-rRNA processing protein, homologous to             | Esf1                      |
| 36589 | 1452286_at   | SLAIN motif family, member 2                                           | Slain2                    |
| 21623 | 1437309_a_at | replication protein A1                                                 | Rpa1                      |
| 15820 | 1431506_s_at | peptidyl prolyl isomerase H /// similar to peptidyl prolyl isomerase H | EG665989 /// LOC100043974 |
| 12547 | 1428233_at   | cleavage and polyadenylation specific factor 6                         | Cpsf6                     |
| 25029 | 1440715_s_at | DNA segment, Chr 11, ERATO Doi 497, expressed in HeLa cells            | D11Ertd497e               |
| 10291 | 1425977_a_at | STE20-like kinase (yeast)                                              | Slk                       |
| 12642 | 1428328_at   | nucleoporin 50                                                         | Nup50                     |
| 381   | 1416042_s_at | nuclear autoantigenic sperm protein (histone-binding protein)          | LOC100043974              |
| 2453  | 1418114_at   | recombination signal binding protein for immunoglobulin                | Rbpj                      |
| 7612  | 1423298_at   | adducin 3 (gamma)                                                      | Add3                      |
| 37566 | 1453263_at   | MAK10 homolog, amino-acid N-acetyltransferase subunit                  | Mak10                     |
| 8062  | 1423748_at   | pyruvate dehydrogenase kinase, isoenzyme 1                             | Pdk1                      |
| 39507 | 1455204_at   | phosphatidylinositol transfer protein, cytoplasmic                     | Pitpnc1                   |
| 2361  | 1418022_at   | NMDA receptor-regulated gene 1                                         | Narg1                     |

**Supplementary Table 2. Summary of miRNA array analysis**

|                       | <b>Probeset ID</b> | <b>Systematic Name</b> | <b>Fold Change<br/>(WT vs. MI)</b> | <b>Fold Change<br/>(WT vs. RQ)</b> |
|-----------------------|--------------------|------------------------|------------------------------------|------------------------------------|
| <b>Up-regulated</b>   | 3674               |                        | 1.52                               | <b>3.18</b>                        |
|                       | 8598               | miR-155                | 1.31                               | <b>2.92</b>                        |
|                       | 4476               |                        | 1.34                               | <b>2.66</b>                        |
|                       | 14869              |                        | -1.09                              | 1.61                               |
|                       | 2246               | miR-652                | -1.15                              | 1.57                               |
|                       | 836                |                        | -1.17                              | 1.54                               |
| <b>Down-regulated</b> | 8889               |                        | -1.19                              | -1.69                              |
|                       | 18032              |                        | -1.17                              | -1.66                              |
|                       | 6907               | miR-148                | -1.19                              | -1.64                              |
|                       | 1739               |                        | -1.14                              | -1.62                              |
|                       | 4328               |                        | 1.10                               | -1.66                              |
|                       | 10016              | miR-152                | 1.02                               | -1.57                              |
|                       | 6331               |                        | 1.08                               | -1.56                              |
|                       | 4115               |                        | -1.03                              | -1.64                              |
|                       | 9932               | miR-744                | -1.01                              | -1.61                              |
|                       | 11089              |                        | -1.00                              | -1.60                              |

**Supplementary Table 3. Altered signaling pathways in R1699Q embryoid body**

| <b>Up-regulated Pathway</b>                       | <b>-Log (P-value)</b> |
|---------------------------------------------------|-----------------------|
| Hypoxia Signaling in the Cardiovascular System    | 5.90E+00              |
| Protein Ubiquitination Pathway                    | 5.60E+00              |
| Wnt/b-catenin Signaling                           | 5.35E+00              |
| Cell Cycle: G2/M DNA Damage Checkpoint Regulation | 2.83E+00              |
| Estrogen Receptor Signaling                       | 2.68E+00              |
| PI3K/AKT Signaling                                | 2.68E+00              |
| Tight Junction Signaling                          | 2.63E+00              |
| p53 Signaling                                     | 2.43E+00              |
| <b>Down-regulated Pathway</b>                     | <b>-Log (P-value)</b> |
| IGF-1 Signaling                                   | 2.20E+00              |

**Supplementary Table 4. Tumors analyzed from the *Brcal*<sup>ko/+</sup>;*Trp53*<sup>ko/+</sup>;*Tg*<sup>R1699Q</sup> and *Brcal*<sup>ko/+</sup>;*Trp53*<sup>ko/+</sup>;*Tg*<sup>M1652I</sup> mice**

| <b>Tg</b>     | <b>Number/Gen</b> | <b>Tumor</b> | <b>Age (months)</b> |
|---------------|-------------------|--------------|---------------------|
| <b>M1652I</b> | 28 Male           | Liver        | 20                  |
|               | 29 Male           | Liver        | 23                  |
|               | 30 Male           | Liver        | 20                  |
|               | 169 Female        | Liver        | 14                  |
| <b>R1699Q</b> | 93 Male           | Liver        | 18                  |
|               | 163 Male          | Skin         | 14                  |
|               | 435 Male          | GI*          | 15                  |
|               | 489 Male          | GI           | 15                  |
|               | 491 Male          | Skin         | 15                  |
|               | 515 Female        | Mammary      | 14                  |
|               | 519 Male          | GI           | 16                  |
|               | 578 Male          | Liver        | 13                  |

\* GI : Gastrointestinal tract

**Supplementary Table 5. Primers used in this study**

| <b>Primers for BAC Mutagenesis</b> | <b>Sequences</b>                                                                                                                 |
|------------------------------------|----------------------------------------------------------------------------------------------------------------------------------|
| M1652I M1 (Hit Forward))           | CTGCTGGGTATAATGCAATGGAAGAAAGTGTGAGCAGGGAGAAGCCAGAATTGAC<br>AGCTTCAACAGAAAGGGTCAACAAAGGATCCTAGAATTCCTCGAG                         |
| M1652I M2 (Hit Backward)           | TCTTTCCAGAATGTTGTTAAGTCTTAGTCATTAGGGAGATACATATGGATACTCA<br>CAAATTCTTCTGGGGTCAGGCCACTCGAGGAATTCTAGGATCC                           |
| M1652I M3 (Fix Forward)            | CTGCTGGGTATAATGCAATGGAAGAAAGTGTGAGCAGGGAGAAGCCAGAATTGAC<br>AGCTTCAACAGAAAGGGTCAACAAAGAATGTCCATCGTGGTGTGTC                        |
| M1652I M4 (Fix Backward)           | TCTTTCCAGAATGTTGTTAAGTCTTAGTCATTAGGGAGATACATATGGATACTCA<br>CAAATTCTTCTGGGGTCAGGCCAGACACCACGATGGACATTCT                           |
| R1699Q M1 (Hit Forward)            | GCTTCTTAGGACAGCACTTCCTGATTTTGTGTTTCAACTTCTAATCCTTTGAGTGTGTTT<br>TCATTCTGCAGATGCTGAGTTTGGATCCTAGAATTCCTCGAG                       |
| R1699Q M2 (Hit Backward)           | AAGGGAGGAGGGGAGAAATAGTATTATACTTACAGAAATAGCTAACTACCCATTTT<br>CCTCCCGAATTCCTAGAAAATATCTCGAGGAATTCTAGGATCC                          |
| R1699Q M3 (Fix Forward)            | GCTTCTTAGGACAGCACTTCCTGATTTTGTGTTTCAACTTCTAATCCTTTGAGTGTGTTT<br>TCATTCTGCAGATGCTGAGTTTGTGTGTGAACAGACACTGAA                       |
| R1699Q M4 (Fix Backward)           | AAGGGAGGAGGGGAGAAATAGTATTATACTTACAGAAATAGCTAACTACCCATTTT<br>CCTCCCGAATTCCTAGAAAATATTTCAAGTGTCTGTTACACAC                          |
|                                    |                                                                                                                                  |
| <b>ChIP primers</b>                | <b>Sequences</b>                                                                                                                 |
| mBIC Brca1-1 ChIP                  | AAG TTT GCA ACT TCC CCT GC<br>TCG TGA CTC ATA ACC GAC CAG                                                                        |
| mBIC Brca1-2 ChIP                  | GAG CTT CTG TGC CTG TTT GC<br>CTA ATA GAT CGG GTC CAT TCC                                                                        |
| hBIC BRCA1 ChIP1                   | CTG TAG GTT CCA AGA ACA GG<br>TCC GCT ATC CGC TCC CTT CC                                                                         |
| hBIC BRCA1 ChIP2                   | GAC CAG AGA TTG CGC TGG AT<br>AAG AAA GGC AAC CGC TCG GC                                                                         |
| hEsrrg ChIP                        | GTT CTG ATG GCC ATT CAT GG<br>CAC ATT GAT TCC AGC TGT TCG                                                                        |
| hStat5a ChIP                       | GAA AAG CCC TAG CCG TCG AG<br>ACA GAG ATG GTG AGG AGT GG                                                                         |
| hCyclinB1 ChIP                     | CTG ATT TTC CCA TGA GAG GC<br>GAT TGT CCA GTT TCC CAA GG                                                                         |
|                                    |                                                                                                                                  |
| <b>Genotyping primers</b>          | <b>sequences</b>                                                                                                                 |
| Brca1 Conditional                  | TAT CAC CAC TGA ATC TCT ACC G<br>GAC CTC AAA CTC TGA GAT CCA C<br>TAT TCT TAC TTC GTG GCA CAT C<br>TCC ATA GCA TCT CCT TCT AAA C |
| K14 Cre                            | TTT TCA AGG CAA TCA GGG TA<br>CAT CAC TCG TTG CAT CGA CC                                                                         |
| Brca1 knockout                     | GGA CGG CAG ATA AAT CCA TTT CTT CC<br>GGT ACA AAG CCA GTG TGG GTT ACA TG                                                         |

|                                    |                                                                  |
|------------------------------------|------------------------------------------------------------------|
|                                    | GGA ATG TTT CCA CCC AAT GTC GAG C                                |
|                                    | CATC AGA GCC GATT GTC TGT TG                                     |
| Trp53                              | CGT GAT ATT GCT GAA GAC CTT GGC                                  |
|                                    | CCT CAA TAA GCT ATT CTG CCA GCT G                                |
|                                    | CTG TCT TCC AGA TAC TCG GGA TAC                                  |
| Brcal R1699Q /<br>M1652I BAC TG    | ATG GAG GAA CCC ACA TAG GC                                       |
|                                    | TAT GGG ATA GAG GTG AGA TCC                                      |
|                                    |                                                                  |
| <b>Real-time PCR primers</b>       | <b>sequences</b>                                                 |
| Oct4                               | CCG TGT GAG GTG GAG TCT GGA G                                    |
|                                    | GCG ATG TGA GTG ATC TGC TGT AGG                                  |
| Nanog                              | GAA ATC CCT TCC CTC GCC ATC                                      |
|                                    | CTC AGT AGC AGA CCC TTG TAA GC                                   |
| B-T                                | TAC ACA CCA CTG ACG CAC ACG                                      |
|                                    | GAG GCT ATG AGG AGG CTT TG                                       |
| mBrcal                             | CAG GTC TAT TGT TGT GAG CC                                       |
|                                    | TCT GTA CCA GGT AGG CAT CC                                       |
| hBRCA1 (LOH)                       | AAC CAC AGT CGG GAA ACA AG                                       |
|                                    | TAA CTG TCT GTA CAG GCT TG                                       |
| Gadd45a                            | TAG CTG AGC TGC TGC TAC TG                                       |
|                                    | GTT CCG GGA GAT TAA TCA CG                                       |
| CyclinB1                           | GAG AAG CTT TCT CCT GAA CC                                       |
|                                    | TTT GGT CTA ACT GAC TGC TC                                       |
| pri-miR155                         | CCT CAT GAA ACC AGC TCA TCT G                                    |
|                                    | CAG GTA GGA GTC AGT CAG AG                                       |
| Actin                              | TCC TCC TGA GCG CAA GTA CT                                       |
|                                    | ACG CGT TCA ATC CAA AAC AG                                       |
| Lamb1                              | CTA TCC AAC TGG ATT TGG AAG C                                    |
|                                    | TCC GTT GAG GGT TCA ATG TCG                                      |
| mmu-miR-155                        | Mm_miR-155_1 miScript Primer Assay (UUAAUGC UAAUUGUGAUAGGGGU)    |
| Hs miR-155                         | Hs_miR-155_1 miScript Primer Assay<br>(UUAAUGC UAAUCGUGAUAGGGGU) |
| RNU6B_2                            | miScript PCR control (Cat no.218380)                             |
| RNU5A_1                            | miScript PCR control (Cat no. MS00013993)                        |
|                                    |                                                                  |
| <b>Northern / Southern primers</b> | <b>sequences</b>                                                 |
| mmu-miR-155 probe                  | CCC CTA TCA CAA TTA GCA TTA A                                    |
| Hs-miR-155 probe                   | CCC CTA TCA CGA TTA GCA TTA A                                    |
| Hs U6 Probe                        | AAC CGT ATG CGT GTT GTC AGG                                      |
| mmu U6 probe                       | GCT AAT CTT CTC TGT ATC GT                                       |
| mBRCA1 Probe (LOH)                 | AAC TGC TAA AGC GTC TCC AC                                       |
|                                    | CAA CAT AAA CGC TAA CCA ACC                                      |

| <b>Others</b>                    | <b>sequences</b>                                                                                                                                                                                                                                                                      |
|----------------------------------|---------------------------------------------------------------------------------------------------------------------------------------------------------------------------------------------------------------------------------------------------------------------------------------|
| miR-155 Reporter construct       | CTA GCC CCT ATC ACA ATT AGC ATT AA<br>AGC TTT AAT GCT AAT TGT GAT AGG GG                                                                                                                                                                                                              |
| R1699Q Site-Directed Mutagenesis | GCT GAG TTT GTG TGT GAA CAG ACA CTG AAA TAT TTT CTA GG                                                                                                                                                                                                                                |
| BRCA1 ShRNA                      | Target set for NM_007294 (12 Clones, Open Biosystem Cat. No.RHS4529-NM_007294)                                                                                                                                                                                                        |
| <b>Promoter mutagenesis</b>      |                                                                                                                                                                                                                                                                                       |
| BIC Br1-2 Mut1                   | 5'- ACC TCG AGT AGA TGG TAC AAA CCC TAA TAG ATC GGG TCC ATT CCT GAA<br>AGC TGA AAC AAA CAA ACA AAC AAA ACA ACA AAA CAA CAA AAA AGT GAC<br>CTA CGC TCCTAG GAG ATT TCT GAG AAA AAA AAA AGC AAA AAA CAA AAC<br>AAA GCC GCC GCC GCC GCC GAA AAA CCG CCG AGA CAA CTC AAG TGC<br>CTC AGG -3 |
| BIC Br1-2 Mut2F                  | CGT AGG TCA CTT TTT TCG GCT TTT CGG CTT TTG TTT GTT TGT TTG                                                                                                                                                                                                                           |
| BIC Br1-2 Mut2R                  | CAA ACA AAC AAA CAA AAG CCG AAA AGC CGA AAA AAG TGA CCT ACG                                                                                                                                                                                                                           |

- 1 Cable, P. L. *et al.* Novel consensus DNA-binding sequence for BRCA1 protein complexes. *Mol Carcinog* **38**, 85-96 (2003).

**Supplementary Table 6. Specific mutations in BRCA1 in human breast tumors**

| Tumor Sample No. | Tumor ID | Specific Mutations |
|------------------|----------|--------------------|
| 1                | 143      | R1751X             |
| 2                | 628      | E402X              |
| 3                | 696      | IVS 4-1G>C         |
| 4                | 764      | 185 delAG          |
| 5                | 967      | E879X              |
| 6                | 1097     | S1383X             |
| 7                | 1118     | S157X              |
| 8                | 8798     | 187delAG           |
| 9                | 8799     | L752X              |
| 10               | 8801     | 5385insC           |
| 11               | 8804     | C61G (300T>G)      |
| 12               | 8805     | del exon 1         |
| 13               | 8806     | C61G (300T>G)      |
| 14               | 8808     | 187delAG           |



## SUPPLEMENTARY FIGURES

**Supplementary Figure 1.** R1699Q BAC transgenic expression does not rescue the embryonic lethality of *Brca1*<sup>ko/ko</sup> mice. **a.** Representative expression profile of R1699Q RNA in multiple tissues from a R1699Q BAC transgenic mouse. **b.** Summary of the number of newborns from *Brca1*<sup>+/ko</sup>; *Tg*<sup>R1699Q</sup> intercrosses. **c.** Representative picture of embryos dissected on E7.5. Genotypes of embryos are indicated at the top (scale bar=100μM).

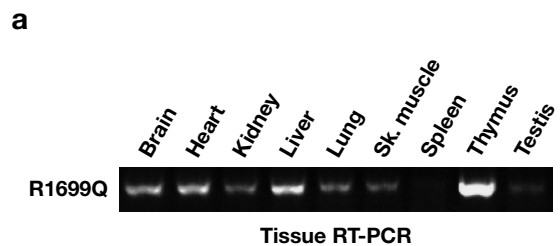

**b**

| R1699Q | <i>Brca1</i> |     |     |
|--------|--------------|-----|-----|
|        | +/+          | +/- | -/- |
| Non-TG | 27           | 62  | 0   |
| TG     | 57           | 125 | 0   |

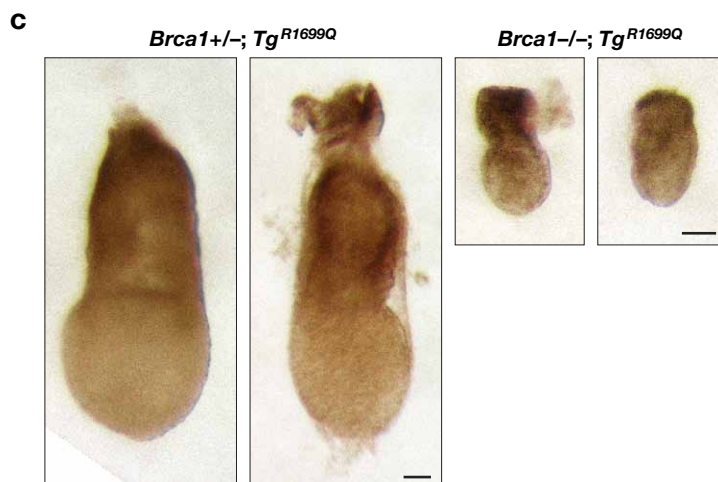

**Supplementary Figure 2.** R1699Q ES cells do not show hypersensitivity to DNA damaging agents (**a-e**), and show normal cell growth (**f, g**) and karyotype (**h**). PL2F8a expressing wild type BRCA1 (PL2) and R1699Q ES cells were treated with Cisplatin, MMC, HU, UV and IR with indicated doses. After 48 hours, the metabolic activity of the cells was measured by alamar blue assay. Cell growth was tested in 96-well plates without feeder cells. Cell cycle was analyzed by PI-BrdU staining (**g**). For karyotyping, ES cells in 6-well plates were treated with colcemid and chromosomes at metaphase were examined. One representative picture is shown out of two independent clones analyzed.

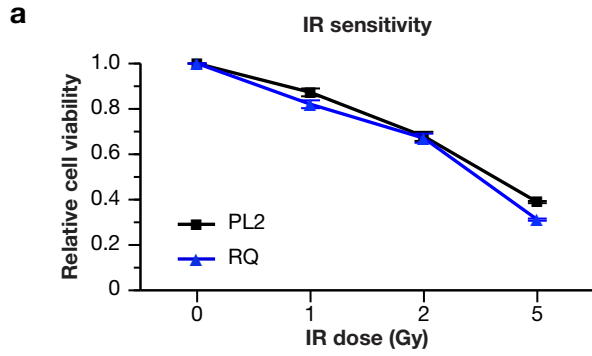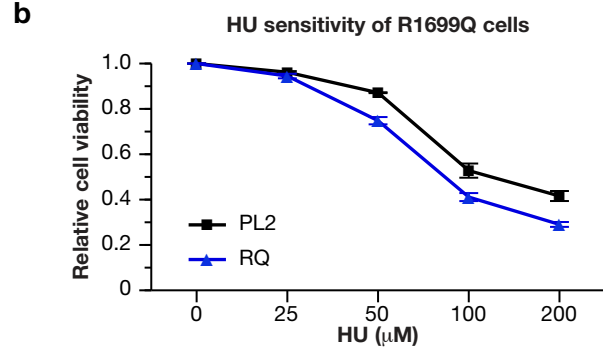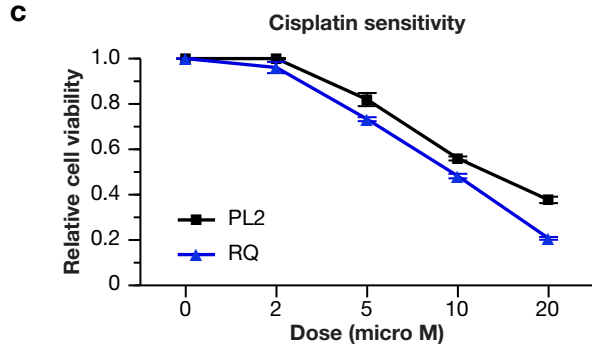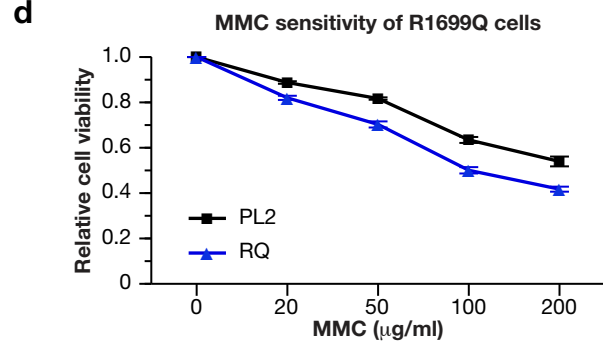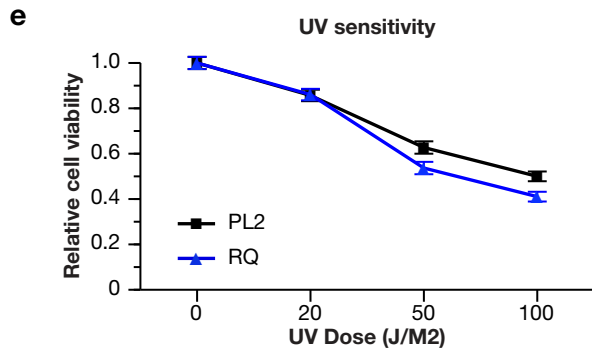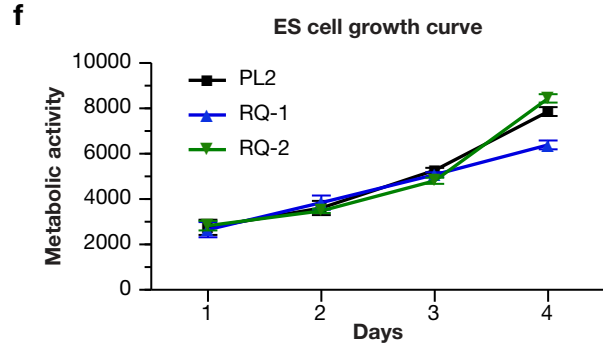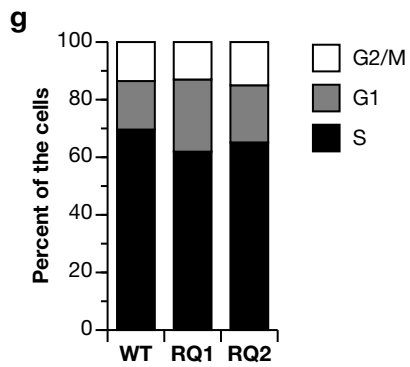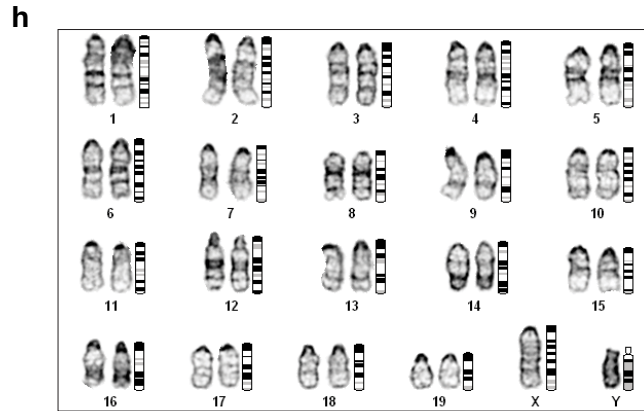

**Supplementary Figure 3.** Differential expressions of *Lamb1* (a), *Brachury T* (b), *Nanog* (c) and *Oct-4* (d) in R1699Q EBs. Wild type (WT), R1699Q (RQ), M1652I (MI) ES cells were cultured in suspension to generate EBs. On day 7, cells were harvested and transcript level of each gene was measured by real-time PCR.

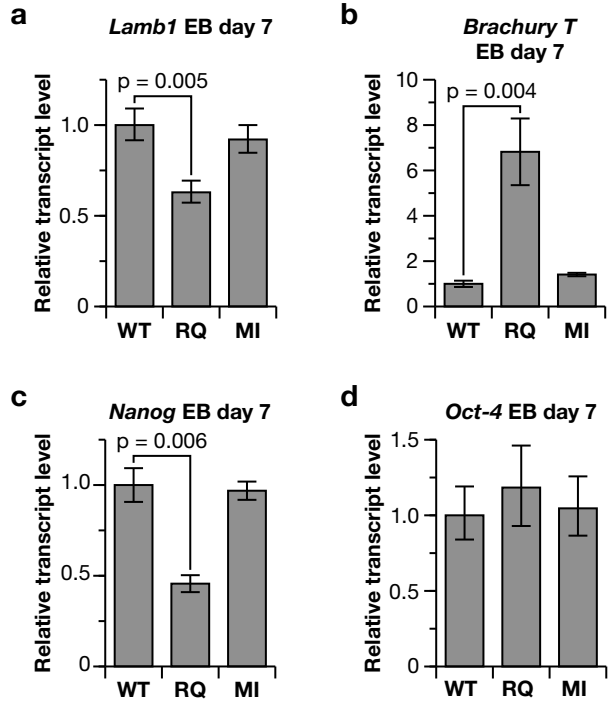

**Supplementary Figure 4.** LOH analysis of tumors with R1699Q mutation

a. Southern hybridization of *Brcal* shows LOH of *Brcal* in 6 out of 7 tumors from *Brcal<sup>kol+</sup>;Trp53<sup>kol+</sup>;Tg<sup>R1699Q</sup>* mouse. Note that the tumor 163 with no LOH had low level of miR-155 in the Fig 3a ( asterisk : signal from partial digested DNA). b. Real time PCR quantitation of *BRCA1* gene in the FFPE human tumor with R1699Q mutation. Control is a normal breast tissue. *CYCLIN B1* was used as normalizer.

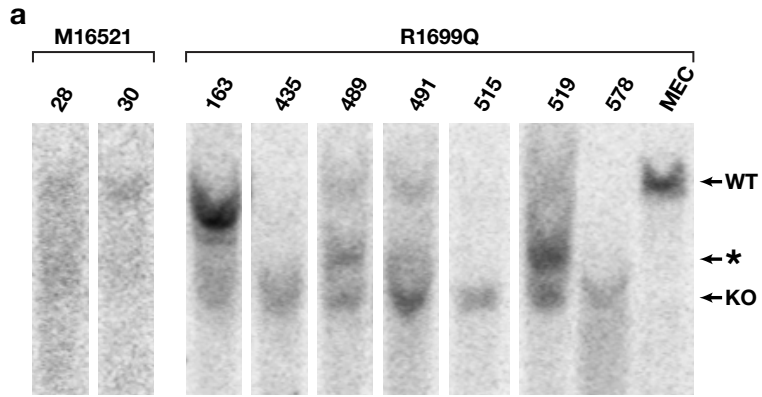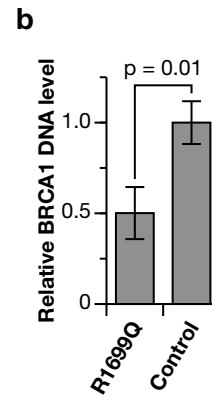



**Supplementary Figure 5.** BRCA1 R1699Q mutation specifically increases miR-155 transcription. **a.** Real-time PCR quantitation of pri-miR-155 in WT and R1699Q ES cells and EBs on day 7. **b.** The effect of BRCA1 on the processing of miR-155 was tested in BRCA1 deficient MDA-MB 436 cells. A construct expressing pri-miR-155 (CMV-pri-miR-155) was co-transfected with HA-tagged WT or R1699Q BRCA1 expression plasmids. Top panel : Western blot of BRCA1, two middle panels : Northern blot of miR-155 and U6 snRNA. Bottom panel: Quantitation of the matured form of miR-155, normalized by U6 snRNA.

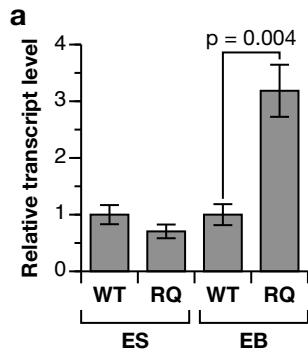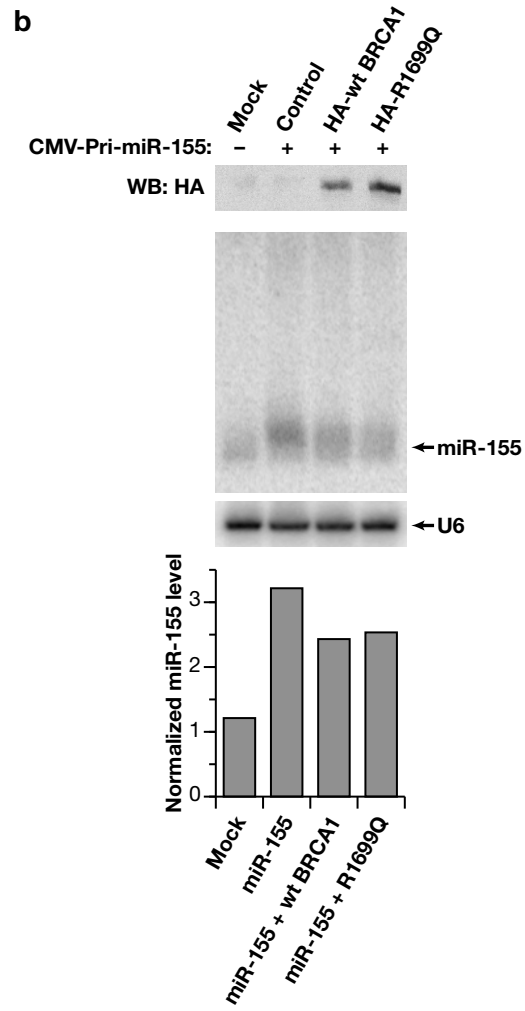

**Supplementary Figure 6.** BRCA1 binding on miR-155 promoter. **a.** Schematic diagram showing the two putative BRCA1 binding regions in the miR-155 promoter. **b.** Sequence of the BRCA1-2 region showing two clusters of putative BRCA1 binding sites (open box : first cluster, shaded box : second cluster). Out of 8 base pair of proposed consensus sequence (T/G-T/G-N-T-GTTG<sup>1</sup>), the last four stringent bases were colored as red (in the first cluster) or blue (in the second cluster). **c.** Sequencing results showing the generation of mutants (Mut1: for the first cluster, Mut2 : for the second cluster and Double : mutant of both clusters (not shown)) in BRCA1-2 region. **d** and **e.** Real-time PCR quantitation of known transcriptional targets of BRCA1 in embryoid bodies generated from *Brcal*<sup>ko/ko</sup> ES cells rescued by WT, R1699Q (RQ) and M1652I (MI) BRCA1: *Gadd45a* (d) and *Cyclin B1* (e) in EB cells.



**Supplementary Figure 7.** BRCA1 epigenetically controls the miR-155 promoter.

**a.** Effect of different HDAC inhibitors on miR-155 level in BRCA1-deficient HCC1937 cells. **b.** CHIP analysis of BRCA1-positive MCF7 and BRCA1-deficient MDA-MB-436 cells. Antibodies specific to acetylated histones H2A, H2B, H3 and H4 were used to test differential histone acetylation on the miR-155 promoter. **c.** CHIP analysis to test association of HDAC1- HDAC5 and HDAC7 on the miR-155 promoter in WT or R1699Q EBs on day 7. Rabbit IgG was used as negative control. **d.** Increasing amount HA-R1699Q expression plasmid was transfected into MDA-MB-436 cells or MCF7 cells along with HA-wt BRCA1. The miR-155 level from the transfected cells is shown. Note that basal level of miR-155 (Con; vector only) in MDA-MB-436 cells is much higher than that in MCF7 cells. **e.** Schematic diagram showing the experimental design of Fig 4i, Note that the possible competition between mouse and human miR-155 promoters for the BRCA1-HDAC2 complex, only when WT but not the mutant mouse miR-155 promoter is transfected into human cell line.

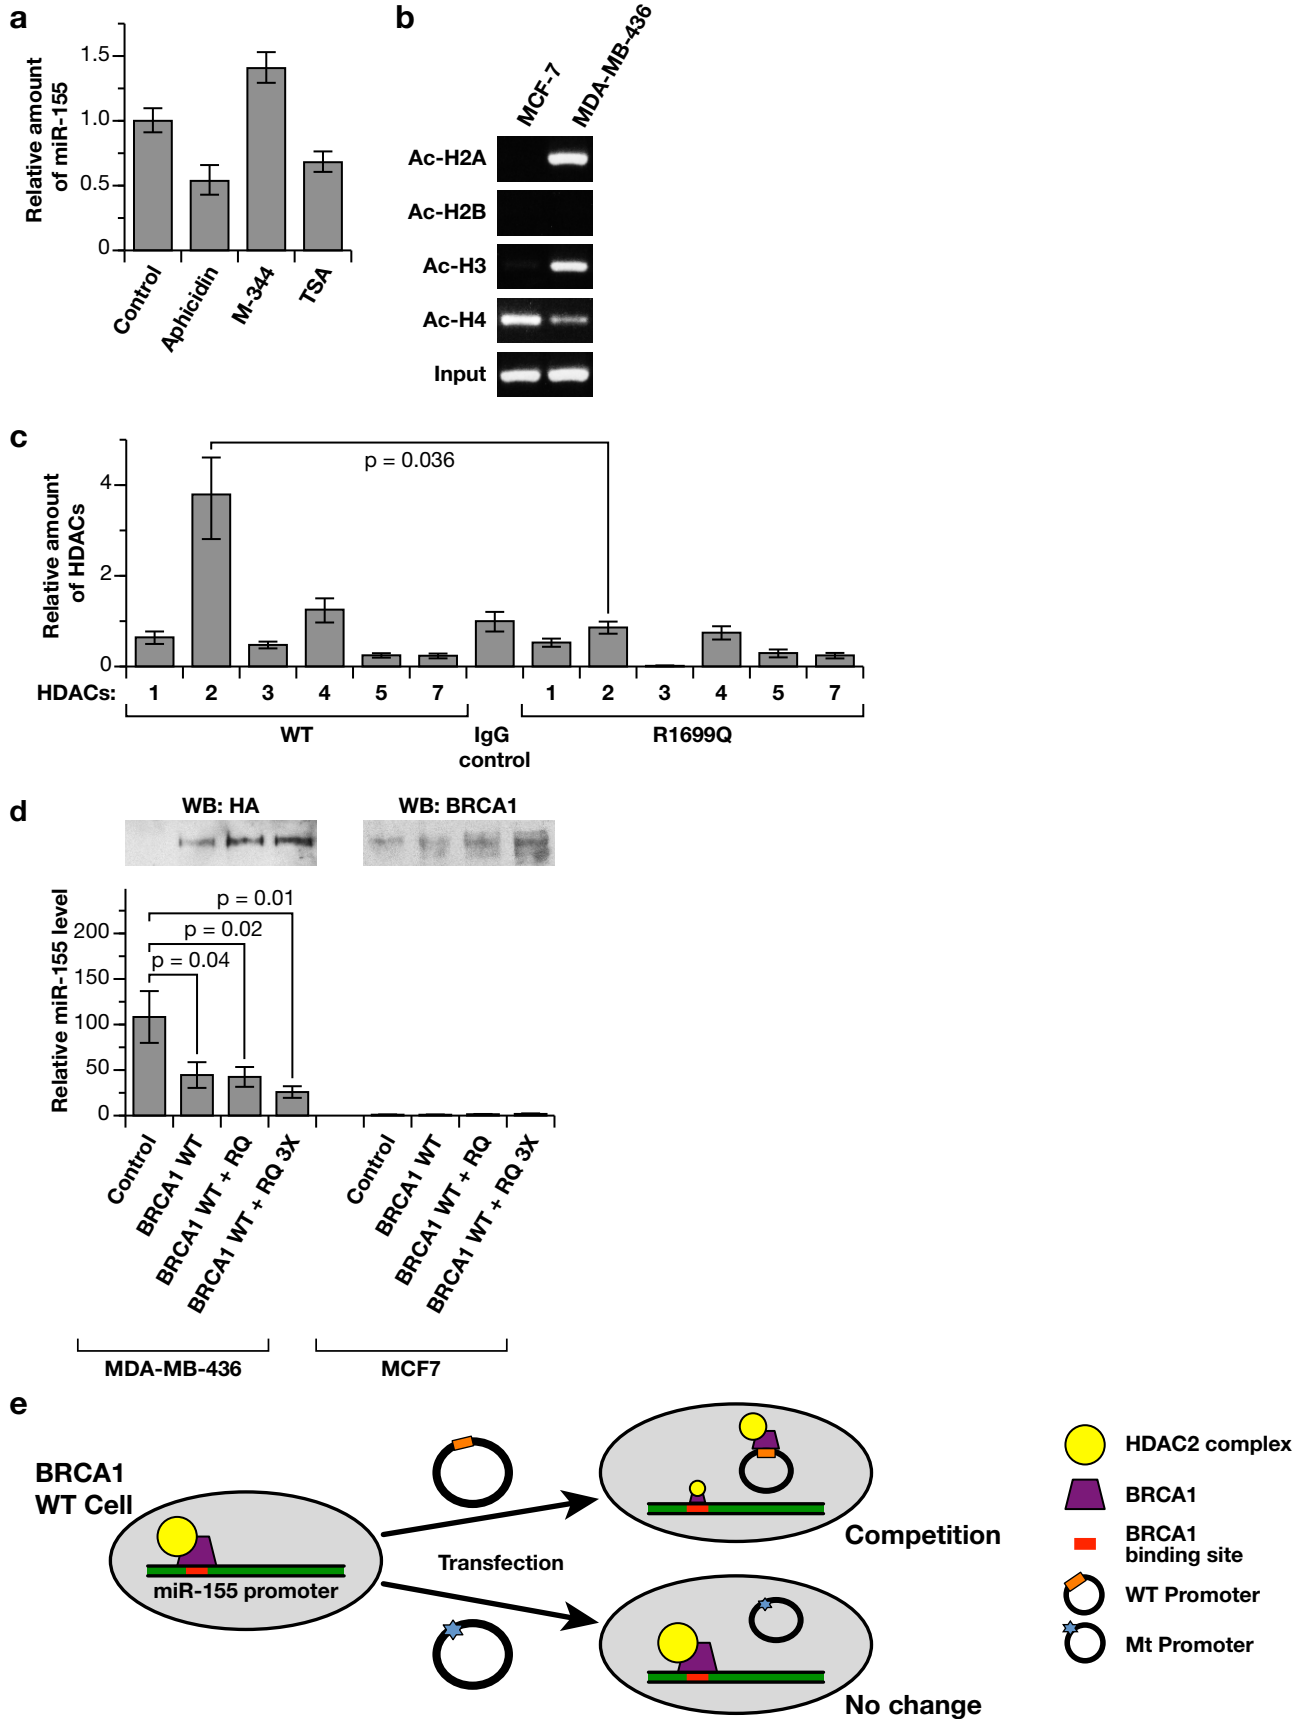

**Supplementary Figure 8.** *In vivo* effect of miR-155 on tumor growth. **a** Real time PCR quantitation of miR-155 from the tumors shown in Fig 5a. **b**. Real time PCR quantitation of miR-155 in mouse Brca1 deficient tumor cell line 69. Note that the miR-155 level is comparably high to human BRCA1 deficient HCC1973 cell **c**. Validation of antagomiR (Sponge). GFP-miR-155 construct was transfected with control or miR-155 expression plasmid (CMV-Pri-miR-155) and the efficient reduction of GFP signal was checked under the fluorescence microscope. **d**. Screening of clones with stable miR-155 knockdown. miR-155 luciferase reporter was transfected into 96 candidate clones and two clones (C9 and D6) showed high luciferase activity compared to parental or other clonal cells.

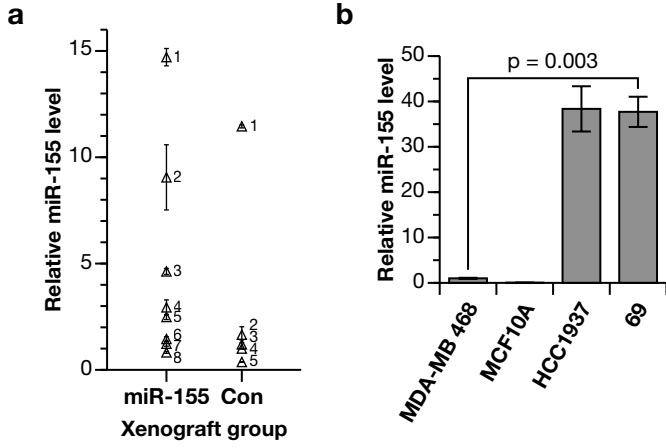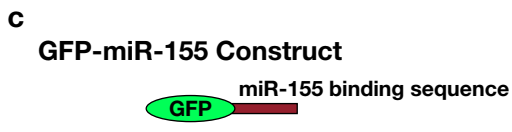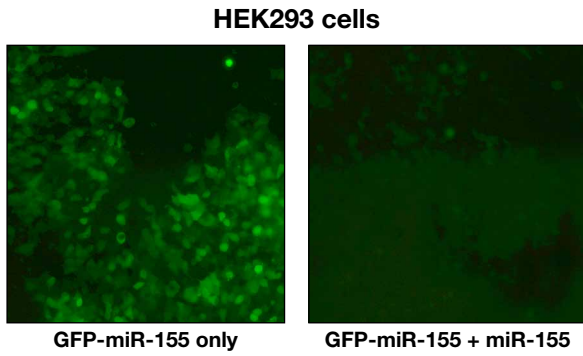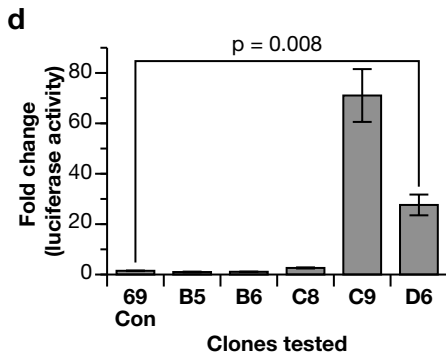



**Supplementary Figure 9.** Human breast tumor tissue array analysis **a.** BRCA1 IHC of 70 tumor tissues with IgG control. **b.** miR-155 *in-situ* hybridization of 70 tumor tissues and two representative pictures of no probe controls.

**a**

miR-155 in-situ

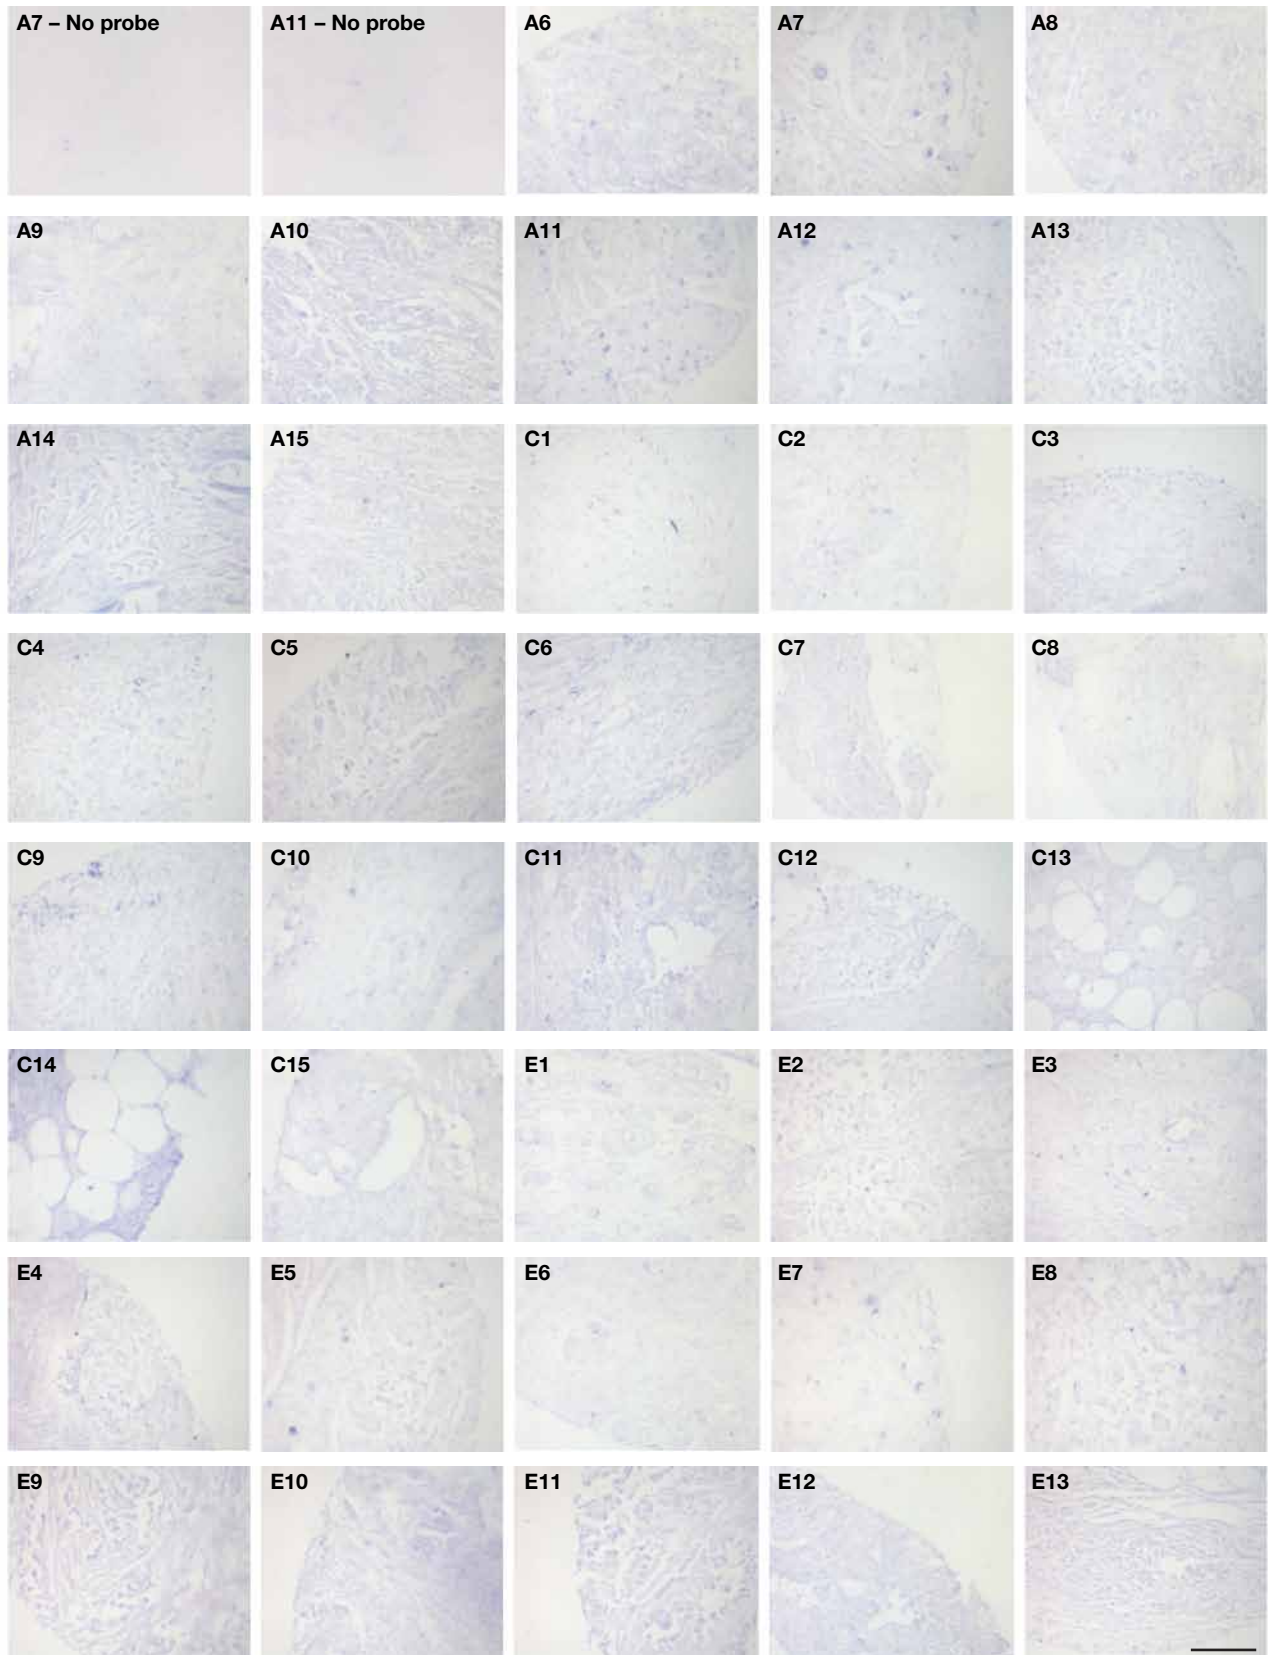

**Chang – Sup Figure 9a**

**a (continued)**

miR-155 in-situ

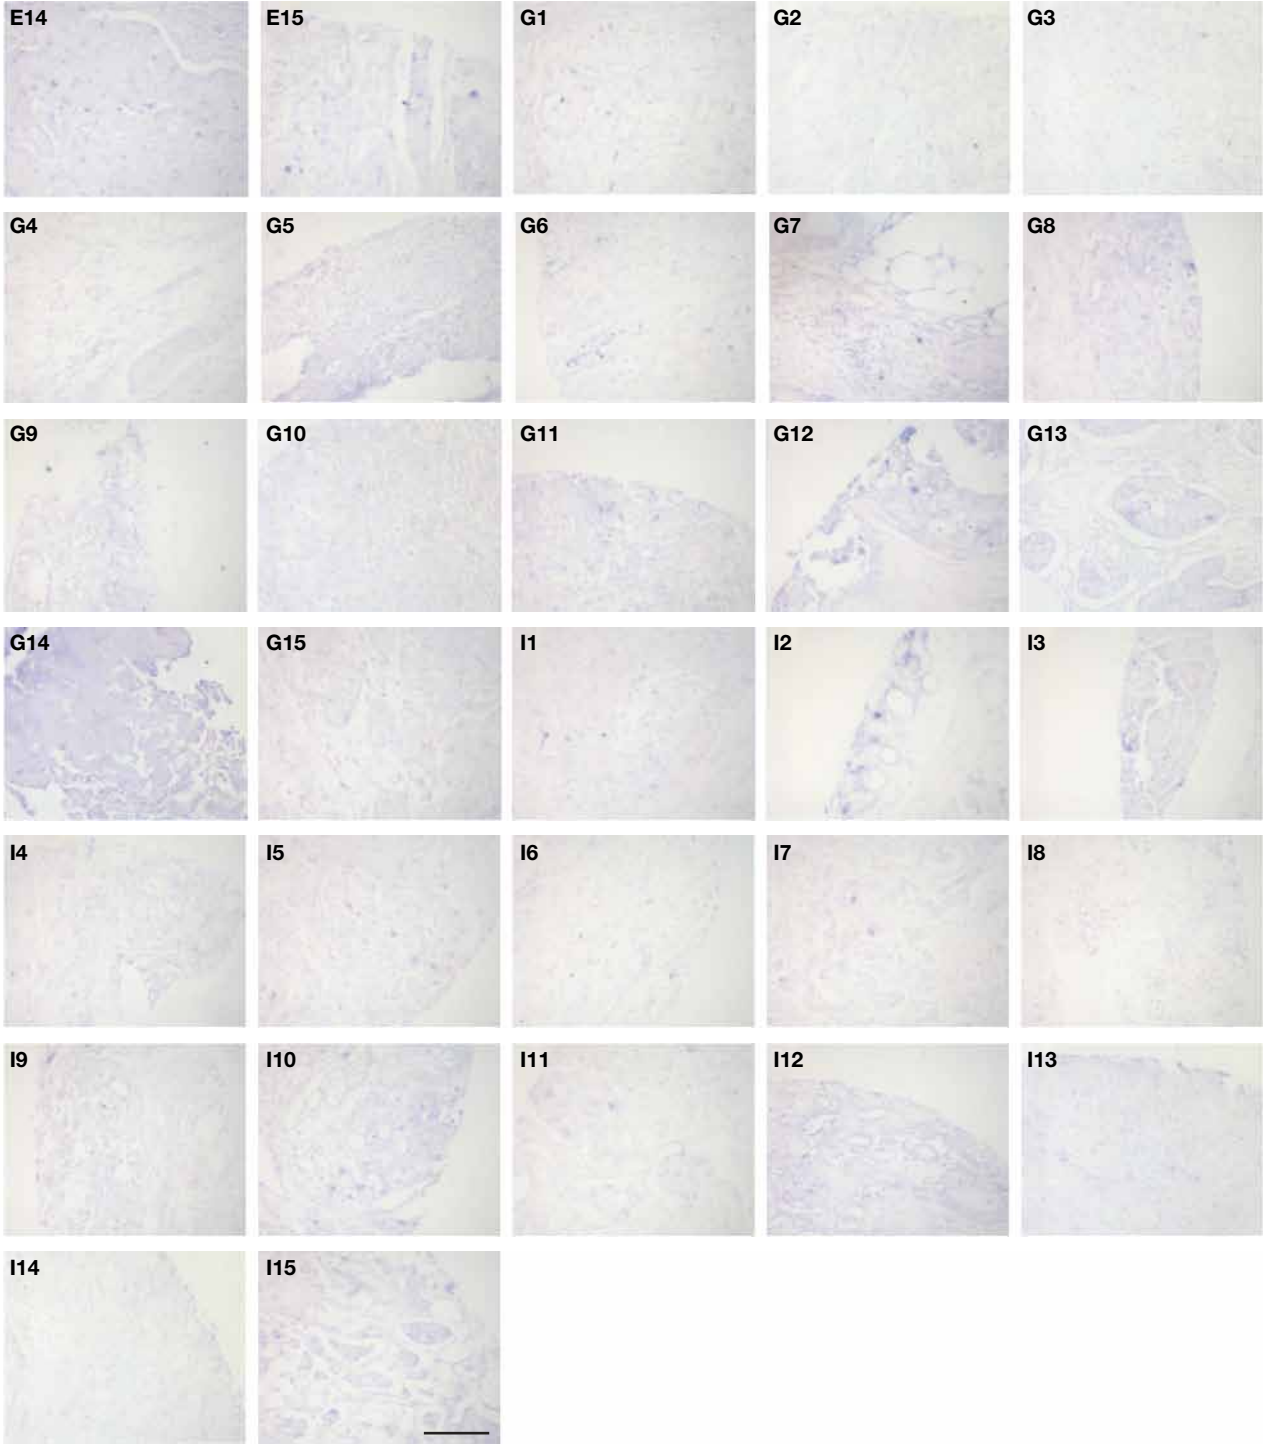

**b**

**BRCA1 IHC**

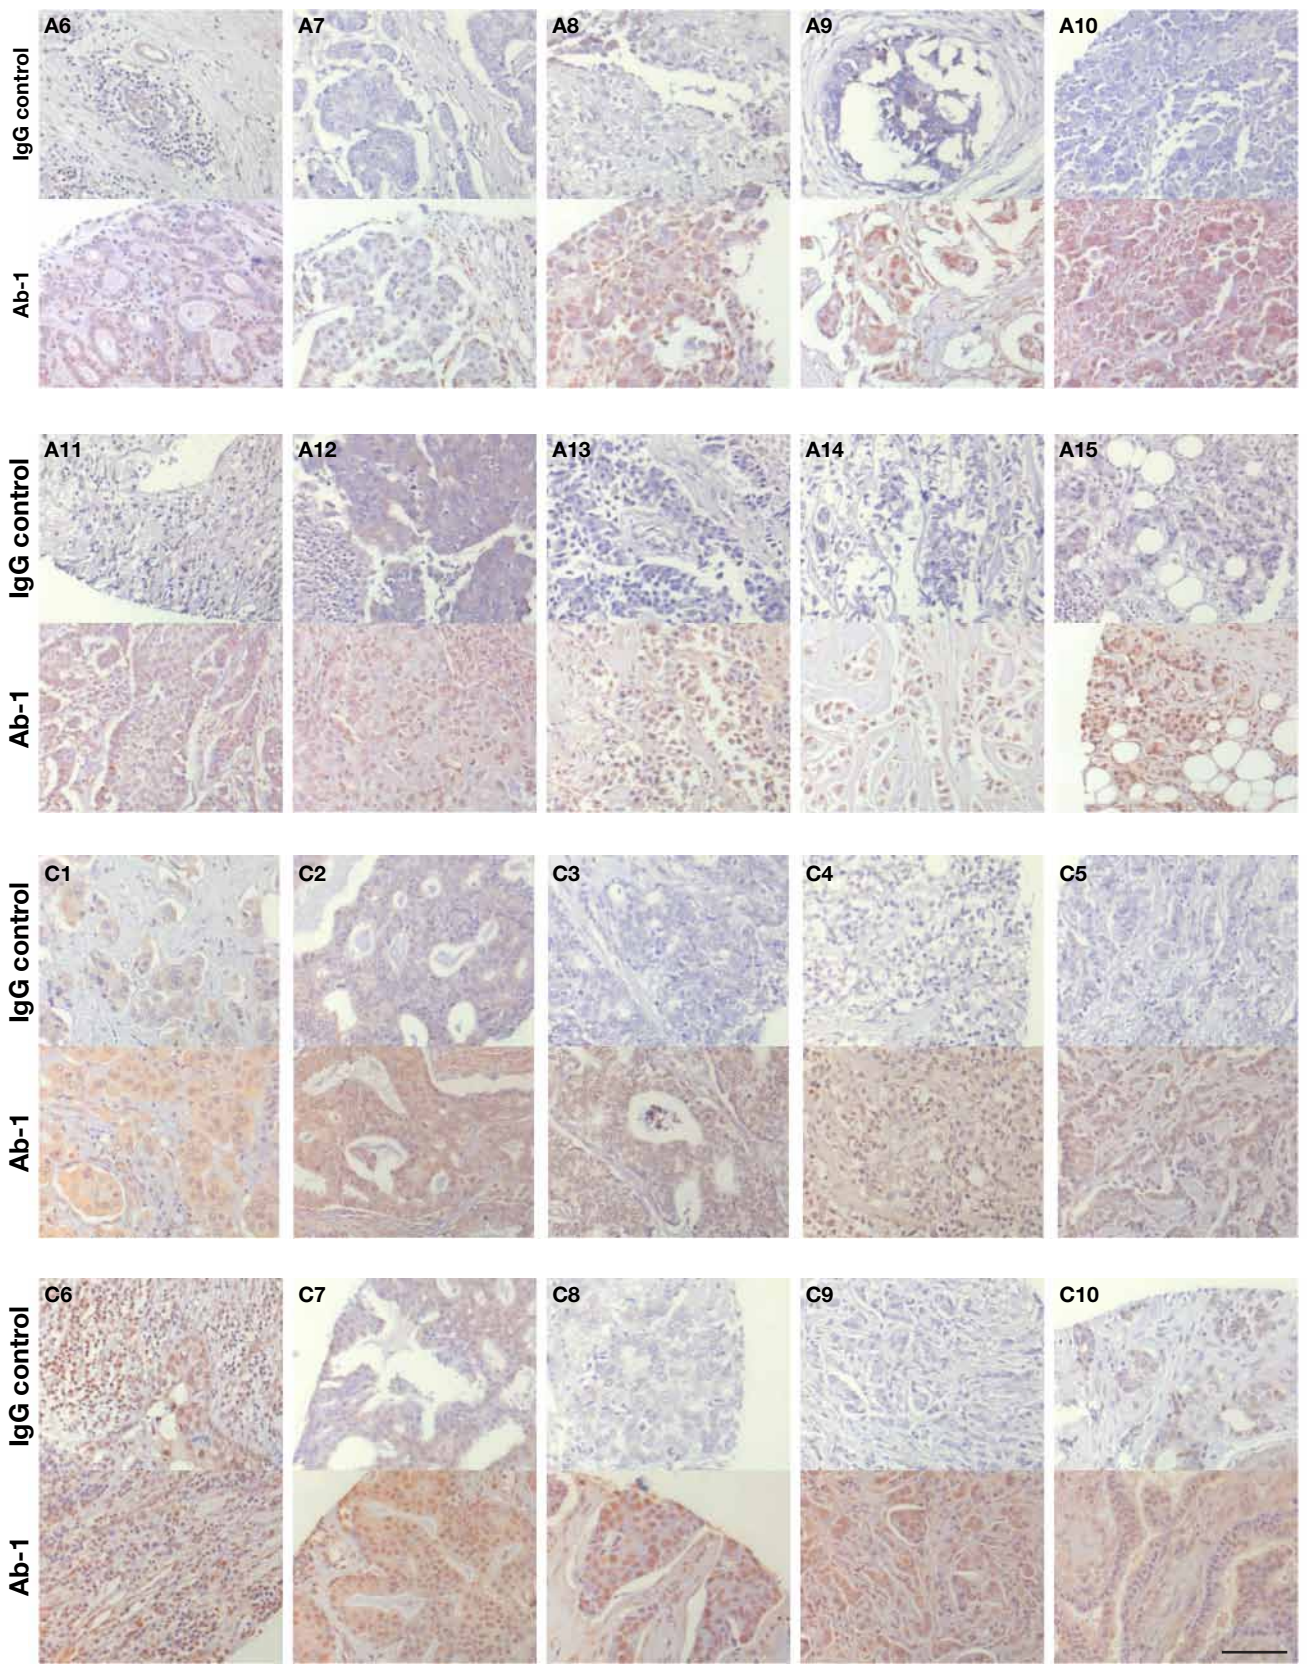

**Chang – Sup Figure 9b**

**b (continued)**

BRCA1 IHC

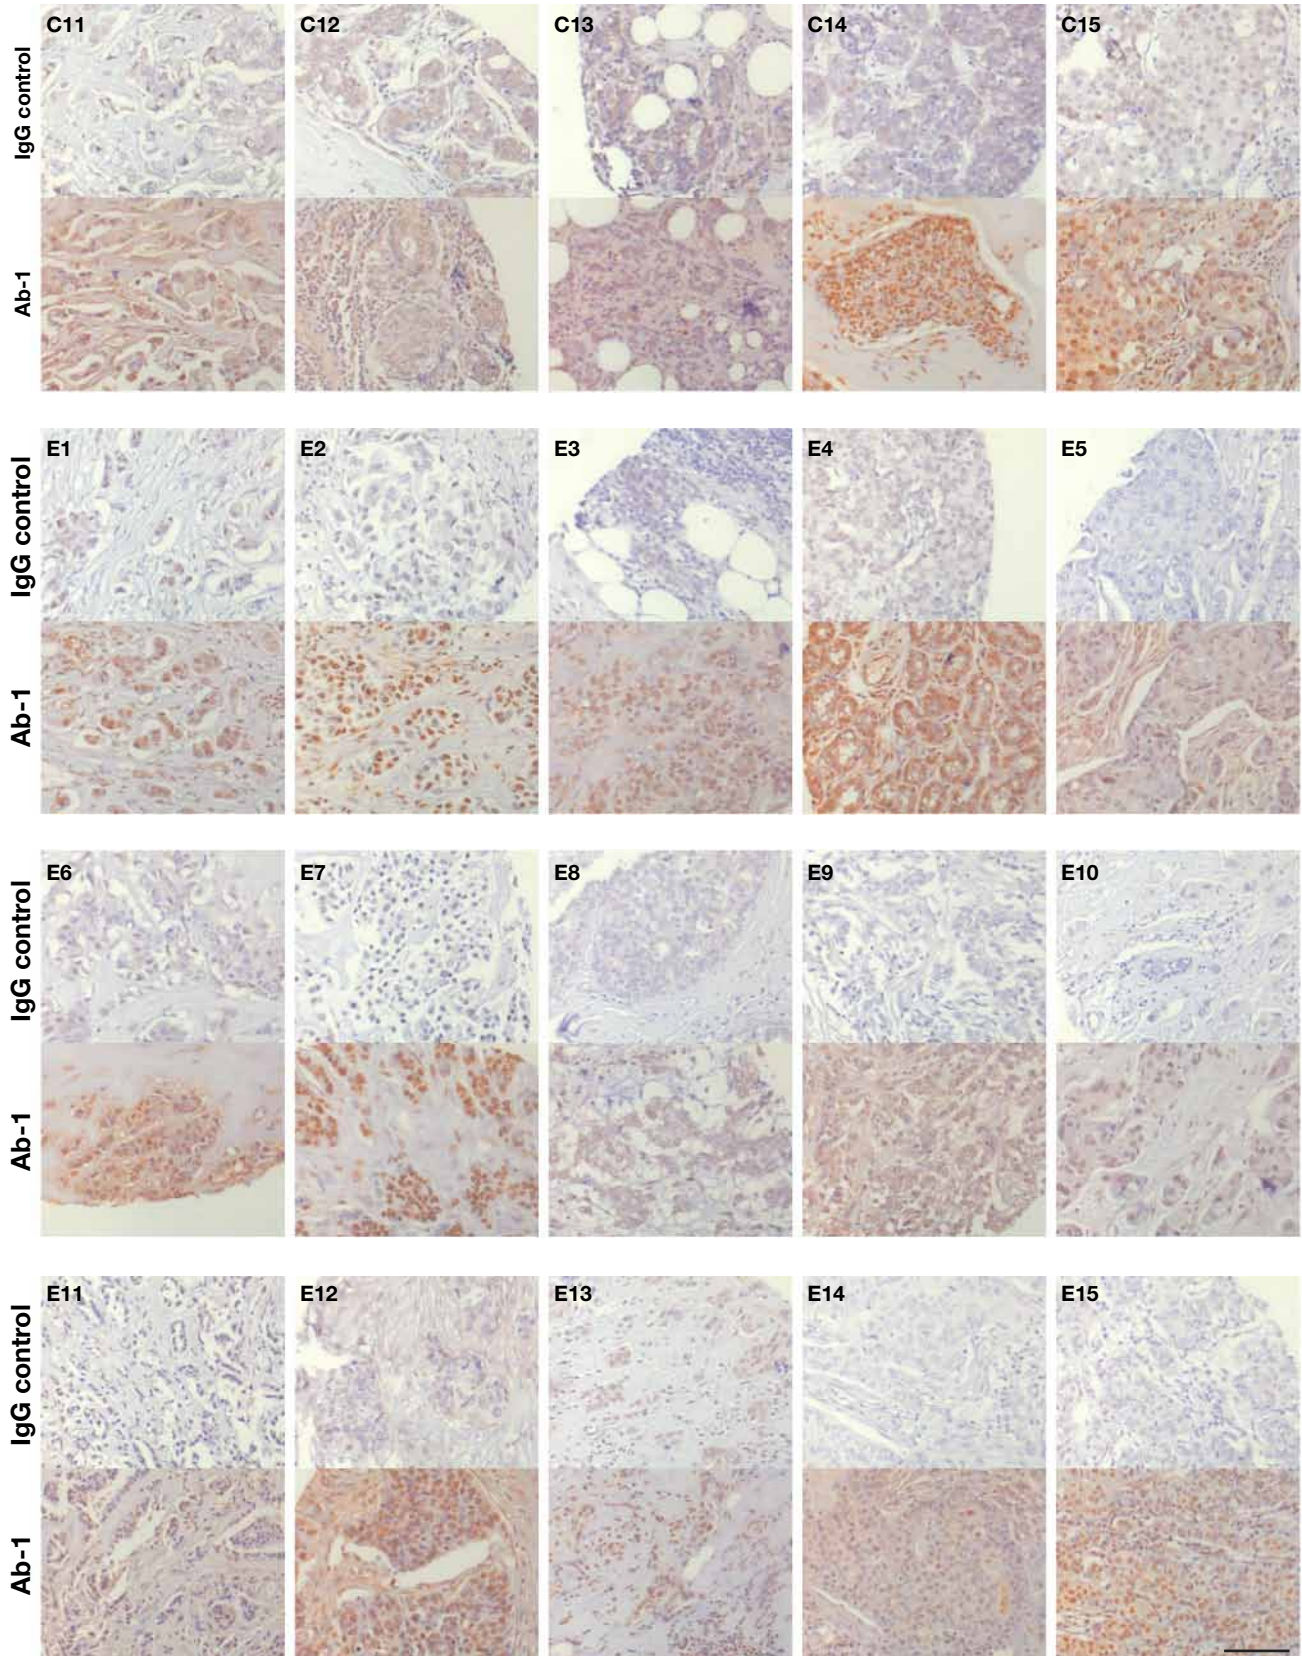

**b (continued)**

BRCA1 IHC

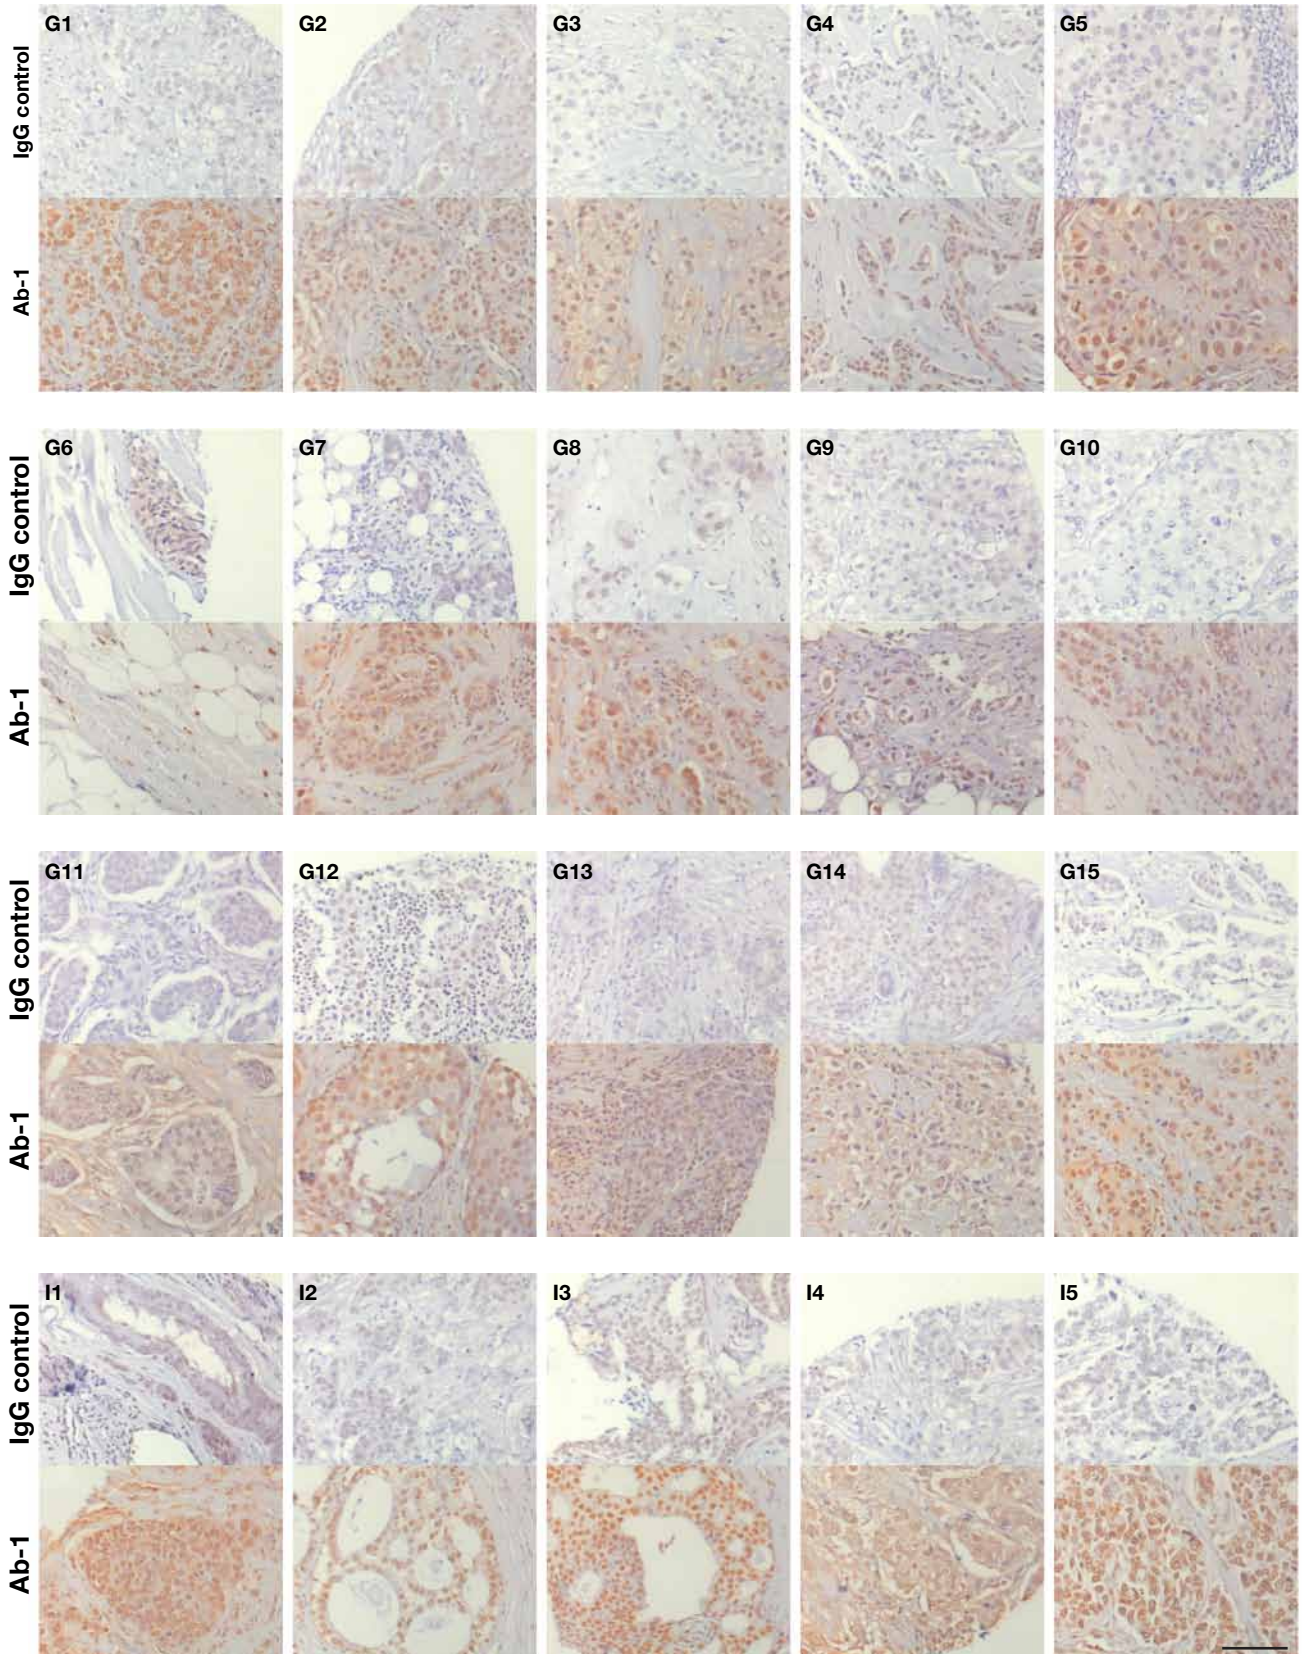

**b (continued)**

BRCA1 IHC

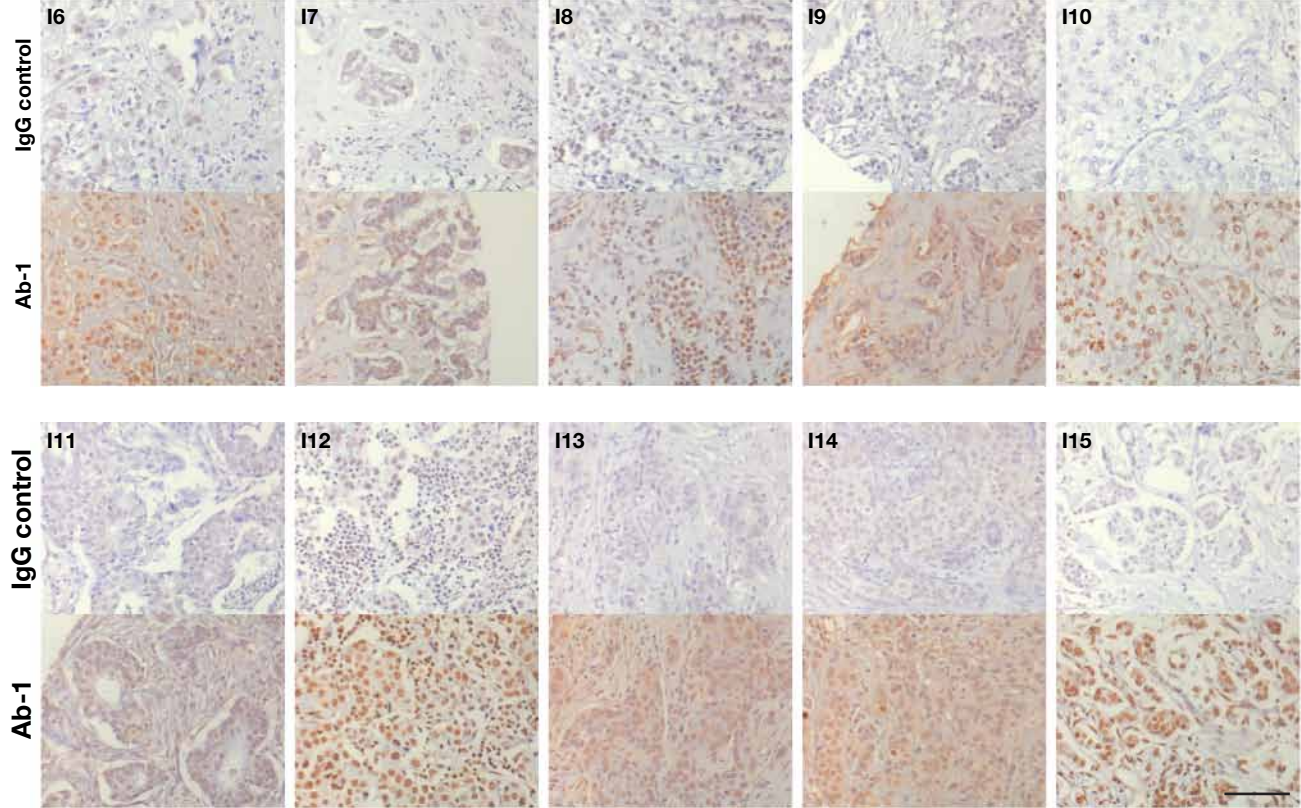

## **SUPPLEMENTARY METHODS**

### **Cell culture and transfection**

ES cells were cultured on mitotically inactivated feeder cells as described earlier<sup>1</sup>. The Human breast cancer cell lines MCF7, HCC1937, MDA-MB-436 (obtained from American Type Culture Collection (ATCC), Rockville, MD), HEK 293 and MDA-MB-468 (generous gift from Dr. Esta Sterneck, NCI) were cultured in DMEM supplemented with 10% FBS and antibiotics. MCF10A cells were cultured in F-12/DMEM (1:1) with supplements as described (ATCC, CRL-10317). Mouse BRCA1 deficient cell line (#69) was cultured in DMEM supplemented with 10% FBS and antibiotics. For transfection of MDA-MB 436 cells, 15 $\mu$ l of Lipofectamine 2000 (Invitrogen) was mixed with 5 $\mu$ g of DNA per one 100mm culture dish with 5ml of Opti-MEM (Invitrogen). For the reporter assay in HCC1937 or MDA-MB-468 cells, the cells in 24 well plates were transfected with 20ng-100ng of DNA mixed with 0.1-0.5  $\mu$ l of lipofectamine 2000. For stable knockdown of BRCA1 in HEK293 cells, 12 clones of BRCA1 shRNA set (see the supplementary Table 6) was transfected and the cells were selected under 1mg/ml G-418 for 1 week. The G-418 positive clones were further expanded to 6 wells and analyzed for BRCA1 level.

### **DNA constructs**

A bacterial artificial chromosome clone (RPCI 11-812-50) containing the full-length human *BRCA1* was used to generate R1699Q using recombineering-based “Hit and Fix” method as described previously<sup>2</sup>. M1652I variant was described previously<sup>1</sup>. Sequence of oligonucleotides used to generate the mutations in the BAC is described in



Supplementary Table 6. The reporter plasmid of miR-155 promoter was constructed by cloning 1.5 kb genomic fragment of mouse *BIC* promoter containing the TATA box into pGL3 Enhancer plasmid (Promega). The first mutation on the BIC promoter (Mut1) was generated by designing a 200mer oligonucleotide with 9 TGGT > GCCG change for putative BRCA1 binding sites. The second mutation (Mut2) was generated by QuickChange II site directed mutagenesis kit (Stratagene). The double mutant was generated by introducing Mut2 in Mut1 reporter construct. miRNA-155 luciferase reporter was constructed by cloning the oligonucleotide of the complementary sequence for matured miR-155 into pMIR-REPORT luciferase reporter plasmid (Ambion). The GFP sponge of miR-155 was generated by using the same oligonucleotide for luciferase reporter, cloned into pEGFP-C1 (Clontech). The HA tagged BRCA1 expression plasmid (BRCA1-HA) is a generous gift from Dr. David M. Livingston. The R1699Q mutation (c.5095G>A) was introduced in BRCA1-HA using QuickChange II site directed mutagenesis kit (Stratagene). For the inducible miR-155, two complementary oligonucleotides with the sequence of the miR-155 precursor were cloned into pSUPERIOR.retro.puro plasmid (OligoEngine) into the *Bgl*III and *Hind*III sites. pcDNA/TR6 vector (Invitrogen) was used to express Tet repressor. The pCS2+BIC134-283 (Designated as CMV-pri-miR-155, generous gift from Dr. David L. Turner) was used for the over-expression of miR-155. All DNA constructs were confirmed by sequencing.

### **Embryoid body analysis**

To generate embryoid bodies, ES cells were trypsinized and the feeder cells were removed by incubating the cells on gelatinized plate for one hour. The ES cells in supernatant were counted and diluted to  $5 \times 10^4$  cells/ml. The cell suspension was cultured in Petri dish, in DMEM-10 media. The media was changed on day 3 and later it was changed every other day. After 14 days, the embryoid bodies were collected.

For histology, the embryoid bodies were fixed in 10% formalin and embedded in paraffin and sectioned. The sections were stained with H&E. To analyze cell death, DeadEnd TUNEL staining kit (Promega) was used as per the manufacture's protocol. For miRNA *in situ* hybridization in embryoid body, DIG labeled LNA-miR-155 probe (Exiqon) was used, followed by the colorimetric detection using REMBRANDT® In Situ Hybridization and Detection kit (Panpath).

### **Western blots and co-immunoprecipitation (co-IP) analysis**

For western blot, cells were lysed on ice in RIPA buffer with protease inhibitor tablet (Roche) for 20minutes. The cleared lysate was added with 2X protein sample buffer and used for western. For co-IP, freshly isolated mammary epithelial cell ( $10^7$  cells) was lysed in modified RIPA buffer (150 mM NaCl, 10 mM Tris, pH 7.2, 0.1% SDS, 0.5% Triton X-100, 0.5% Deoxycholate, 5 mM EDTA) with protease inhibitors. The human specific BRCA1 antibody or rabbit monoclonal HDAC2 antibody was used for IP. The co-immunoprecipitated BRCA1 and HDAC2 were detected by E1 (for BRCA1) or mouse monoclonal HDAC2 antibody.

### **LOH analysis of the tumors**

To test the LOH of the tumors from the *Brcal*<sup>ko/+</sup>; *Trp53*<sup>ko/+</sup>; *Tg*<sup>R1699Q</sup> mice, Southern hybridization was performed using freshly isolated tumor DNA digested with PstI. The probe for *Brcal* detection was generated by PCR (See Supplementary Table5 for sequence) and labeled with Prime-It random primer labeling kit (Stratagene). To measure the copy number of BRCA1 in the R1699Q human tumor, two of 10mM sections of tumor and normal sample were dissolved in paraffin dissolver (Clontech) and the genomic DNA was isolated by FFPE genomic DNA isolation kit (Qiagen). The copy number of *BRCA1* in the genomic DNA was quantified by real-time PCR using *CCNB1* as a control.

### **Teratoma analysis**

The R1699Q and WT ES cells were harvested and washed in PBS. Cells were counted and diluted to a concentration of  $5 \times 10^7$  cell/ml in PBS. 100  $\mu$ l of the cell suspension was injected subcutaneously into athymic nude mouse (C3H/HeNCR-nu). The growth of teratoma was measured after one week, and then measured every other day. Tumor volume (in mm<sup>3</sup>) was calculated as a product of 2 x length x width. Mice were maintained under limited access conditions at the National Cancer Institute (Frederick) and animal care was provided according to the procedures outlined in the Guide for the Care and Use of Laboratory Animals, under an approved Animal Care and Use Committee (ACUC) protocol.

### **Inducible miR-155 expression in ES cells**

For inducible expression of the miR-155, the pSUPERIOR-puro-miR-155 (see DNA constructs), along with pcDNA/TR6 and pmiRep-miR-155, were co-electroporated into wild-type ES cells and selected with puromycin (300 µg/ml) for 5 days. The puromycin resistant colonies were picked and expanded in a 96-well plate. After splitting the cells into three 96 well plates, one plate was treated with tetracycline to test miR-155 induction. By measuring the ratio of miR-155 reporter luciferase activity from induced and uninduced, the ES clone with Tet induced miR-155 expression was identified and used for further analysis. The induction of miR-155 was confirmed by miRNA Northern hybridization as well as real time PCR (Fig 2d).

### **Tumor tissue array analysis**

For human breast tumor analysis, Breast Tumor Tissue Array (BioChain Institute, Inc.) containing 70 breast tumor tissues was used. To access the BRCA1 level in these tumor samples, two tissue array slides were deparaffinized, hydrated and boiled in citrate buffer for antigen exposure. After blocking, the slides were probed with anti-BRCA1 antibody (Ab-1, Calbiochem) or normal mouse IgG (Oncogene), respectively. The BRCA1 signal was detected by Elite ABC HRP detection kit (Vectastain). For the detection of miR-155, DIG labeled LNA-miR-155 probe (Exiqon) was used, following the manufacturer's protocol. The miR-155 expression was visualized by anti-DIG-AP conjugate antibody and NBT/BCIP substrate (included in RAMBRANDT RISH kit used above). One set of tissue microarray was stained with H&E. The stained tissue array was analyzed under the Axioplan2 upright microscope (Zeiss).

## Generation and analysis of the R1699Q BAC transgenic mice

BAC DNA with R1699Q mutation was prepared by Qiagen Maxiprep kit. The purified DNA was diluted in TE buffer to 10ng/ml concentration and used for the microinjection. Mice were genotyped by Southern analysis as described previously<sup>1</sup>. The BAC transgenic founder mice were mated with mice carrying a null allele of *Brcal* (*Brcal*<sup>ko/+</sup>) to obtain BAC transgenic mice on *Brcal* heterozygous background (*Brcal*<sup>ko/+</sup>; *Tg*<sup>R1699Q</sup>). The expression of R1699Q *BRCA1* was examined in several tissues by RT-PCR. To test the embryo development of *Brcal*<sup>ko/ko</sup>; *Tg*<sup>R1699Q</sup> transgenic mice, a pair of R1699Q transgenic mouse with *Brcal* heterozygous background (*Brcal*<sup>ko/+</sup>; *Tg*<sup>R1699Q</sup>) were intercrossed. Embryos at days 7.5 of gestation were dissected under the microscope (LEICA MZ8) and photographed. Embryos were genotyped by PCR using primers as listed in Supplementary Table 6. To generate the *cis-Brcal*<sup>ko/+</sup>; *Trp53*<sup>ko/+</sup>; *Tg*<sup>R1699Q</sup> mouse, *Brcal*<sup>ko/+</sup>; *Trp53*<sup>ko/+</sup> mice were crossed with *BRCA1*; *Tg*<sup>R1699Q</sup> mouse and the co-segregation of *Brcal* and *Trp53* was screened by genotyping PCR. *cis-Brcal*<sup>ko/+</sup>; *Trp53*<sup>ko/+</sup>; *Tg*<sup>M1652I</sup> mouse was generated by the same method.

## Mouse Mammary Epithelial Cell (MEC) isolation and culture

To isolate mammary epithelial cells, the protocol from Stem Cell Technology was used (<http://www.stemcell.com/en/Products/All-Products/EpiCultB-Mouse-Medium-Kit.aspx>). Briefly, freshly dissected mammary gland was digested in digestion media (Epicult-B medium supplemented with 5% FBS and Collagenase/Hyaluronidase) for 8 hrs at 37°C. The dissociated tissue was centrifuged and red blood cells were removed by treating with 0.8% NH<sub>4</sub>Cl with 0.1 mM EDTA. The collected organelles were further digested in

trypsin-EDTA, followed by DNase I and dispase treatment to make a single cell suspension. The resulting cells were plated in 150mm gelatinized culture dish with Epicult-B medium with 5% FBS. One the next day the media was changed to serum free Epicult-B medium supplemented with EGF and FGF and cultured up to near confluency.

## **REFERENCES**

1. Chang, S., Biswas, K., Martin, B.K., Stauffer, S. & Sharan, S.K. Expression of human BRCA1 variants in mouse ES cells allows functional analysis of BRCA1 mutations. *J Clin Invest* **119**, 3160-3171 (2009).
2. Yang, Y. & Sharan, S.K. A simple two-step, 'hit and fix' method to generate subtle mutations in BACs using short denatured PCR fragments. *Nucleic Acids Res* **31**, e80 (2003).

## **SUPPLEMENTARY DISCUSSION**

### **Breast cancer risk of R1699Q variant of BRCA1**

In the past 10 years, many different studies have been undertaken to characterize the R1699Q variant of BRCA1 but its precise effect remains unclear. It was shown to be defective in phospho-specific binding to BACH1<sup>1</sup>. However, structural and biophysical studies suggest that R1699Q is not significantly different from the wild-type BRCA1<sup>2</sup>. This was also supported by the trypsin sensitivity assay, which showed R1699Q behaves similarly to wild type<sup>3</sup>. Yet, another study suggests the R1699Q variant destabilizes BRCA1 based on a similar assay<sup>4</sup>, making the interpretation difficult. The transcriptional activation assays have also given inconsistent results, depending on the cell line used<sup>3-6</sup>. A study using functional and multifactorial likelihood approaches concluded that R1699Q is associated with low to moderate risk of developing the disease compared to other clearly deleterious variant<sup>4</sup>, while another study classified the same variant as deleterious based on cancer family history<sup>7</sup>. The latter study also reported one family in which R1699Q did not segregate with the disease. In summary, the breast cancer risk in R1699Q mutation carriers is likely to be higher compared to the general population, but its precise risk is not known. Future large-scale epidemiological studies may provide a better assessment of the precise risk of this variant.

In this study, we have characterized the R1699Q variant using our mouse ES cell-based assay to examine its effect on BRCA1 function. We found the R1699Q variant to result in a 10-fold reduction in ES cell survival compared to cells expressing the wild-type BRCA1. This suggested that R1699Q is deleterious. This conclusion was further

supported by our *in vivo* studies showing that R1699Q fails to rescue the embryonic lethality of *Brca1-null* mice. Our previous work has demonstrated that most BRCA1 variants that result in ES cell lethality or show reduced cell survival are high-risk variants<sup>8</sup>. These variants also show defect in DNA repair function or cell cycle regulation. Surprisingly, the R1699Q variant had no effect on any of these functions. Instead, we uncovered a defect in ES cell differentiation, which in part was caused by the up-regulation of a miRNA, miR-155.

### **Epigenetic regulation of miR-155 by BRCA1**

In this study, we have focused on understanding mechanistically how BRCA1 controls miRNA-155. The up-regulation of miRNA-155 in many cancers has been reported<sup>9-12</sup>. Several transcription factors that can activate the miR-155 promoter have been identified including AP-1, NF-kB, SMAD4, FOXP3 and HOXA9<sup>13-15</sup>. However, to date there has been no insight into how miRNA-155 may be regulated epigenetically. Our study not only demonstrates that miR-155 is epigenetically regulated, but also uncovers the role of BRCA1 in this control. We found marked increase in acetylation of histones H2A and H3 on the miR-155 promoter in R1699Q mutant cells. The histone acetylation and deacetylation is regulated by the various HAT/HDAC complexes and is important for chromatin organization. The association of BRCA1 with HDAC complex has been described previously<sup>16</sup>. It is also reported that BRCA1-mediated repression of ER- $\alpha$  promoter can be reversed by HDAC inhibitor, trichostatin A<sup>17</sup>. As we have detected an increase in acetylation of histones H2A and H3 on the miR-155 promoter in R1699Q ES cells as well as BRCA1-deficient tumor cell lines, we predicted that the interaction of



mutant BRCA1 with the HDAC complex is reduced or disrupted. Indeed, the ChIP experiment revealed an increase in binding of HDAC2 to the miR-155 promoter in the presence of wild type BRCA1 (Figure 4E). Based on the ChIP and coimmunoprecipitate results, we conclude that R1699Q BRCA1 is defective in the interaction with HDAC complex.

The mutational analysis of miR-155 promoter indicated that the putative BRCA1 binding site is critical for the epigenetic repression. Our observation that there is no or marginal association between BRCA1 and the three promoters with putative BRCA1 binding sites (*ESSRG*, *CCNB1* and *STAT5A*) suggests the association of BRCA1 with the miR-155 promoter is specific. Also, it suggests that the putative BRCA1 binding sites<sup>18</sup> may not necessarily be a good indicator of actual association with BRCA1. A genome-wide ChIP analysis for BRCA1 may provide a better understanding of the predictive value of these putative binding sites and the role of BRCA1 in epigenetic regulation of other promoters.

### **Does R1699Q have any dominant negative effect?**

Because R1699Q BRCA1 fails to bind to HDAC2 but can associate with the miR-155 promoter, we tested the possibility that it may have a dominant negative effect. Although we did not find any *in vitro* evidence to support this, we cannot completely rule out this possibility. Lack of dominant negative effect was also supported by the *in vivo* observation that *Brca1*<sup>ko/+</sup>; *Tg*<sup>R1699Q</sup> mice did not show any overt phenotype and *Brca1*<sup>cko/ko</sup>; *Tg*<sup>R1699Q</sup> EB cells did not show miR-155 up-regulation (data not shown).

Also, tumors from *Brcal*<sup>ko/+</sup>; *Trp53*<sup>ko/+</sup>; *Tg*<sup>R1699Q</sup> mice that showed high miR-155 had lost the WT allele of *Brcal* (Fig. 3a,b and Supplementary Figure 4).

### **Different levels of miR-155 expression in BRCA1-deficient cells**

Interestingly, we found a 3-4 fold increase in miR-155 level in MECs from *Brcal*<sup>cko/cko</sup>; *K14 Cre* mice and HEK 293 cells with BRCA1 knockdown, whereas the miR-155 levels in the tumors or tumor cell lines were much higher (50-150 fold) than the controls. This difference suggests the effect of additional regulatory signals or factors that may be involved in the transcriptional regulation of miR-155 promoter in addition to the BRCA1-mediated epigenetic control. And, these signals may depend upon the physiological or topological state of the cell. Such differences are also visible in the cells of the R1699Q ES cell derived embryoid bodies that are genotypically identical (Figure 2b). Human tumors samples also exhibit a similar variation in their pattern of miR-155 expression (Figure 5d). We also observed substantial differences in the increase of miR-155 expression between human and mouse tumors (3-6 fold compared to 50-180 fold). We attribute this to the difference in the quality of samples used for RNA extraction. For mouse tumors we used freshly-frozen samples whereas for human tumors we extracted RNA from 5-15 years old archived FFPE sections.

### **miR-155 as a biomarker**

This study also shows a correlation between BRCA1 deficiency and miR-155 up-regulation in BRCA1-deficient tumors. However, because multiple transcription factors regulate the miR-155 promoter, it can be activated by other signals, unrelated to BRCA1.

Indeed, we observed high levels of miR-155 in one of the four tumors from Her2/Neu transgenic mice as well as in 10 cases of human breast tumors that were BRCA1 positive. Therefore, miR-155 alone may not be sufficient to determine the functional status of BRCA1. However, miR-155 may be part of a metagene signature that may be useful to determine the functional status of BRCA1. Future studies will be focused on evaluating the use of miR-155 expression to determine the BRCA1 status.

## REFERENCES

1. Clapperton, J. A., *et al.* Structure and mechanism of BRCA1 BRCT domain recognition of phosphorylated BACH1 with implications for cancer. *Nat Struct Mol Biol* **11**, 512-518 (2004).
2. Rowling, P. J., Cook, R., and Itzhaki, L. S. Toward classification of BRCA1 missense variants using a biophysical approach. *J Biol Chem* **285**, 20080-20087 (2010).
3. Williams, R. S., Lee, M. S., Hau, D. D., and Glover, J. N. Structural basis of phosphopeptide recognition by the BRCT domain of BRCA1. *Nat Struct Mol Biol* **11**, 519-525 (2004).
4. Lovelock, P. K., *et al.* Identification of BRCA1 missense substitutions that confer partial functional activity: potential moderate risk variants? *Breast Cancer Res* **9**, R82 (2007).
5. Lee, M. S., *et al.* Comprehensive analysis of missense variations in the BRCT domain of BRCA1 by structural and functional assays. *Cancer Res* **70**, 4880-4890 (2010).

6. Vallon-Christersson, J., *et al.* Functional analysis of BRCA1 C-terminal missense mutations identified in breast and ovarian cancer families. *Hum Mol Genet* **10**, 353-360 (2001).
7. Gomez Garcia, E.B., *et al.* A method to assess the clinical significance of unclassified variants in the BRCA1 and BRCA2 genes based on cancer family history. *Breast Cancer Res* **11**, R8 (2009).
8. Chang, S., Biswas, K., Martin, B.K., Stauffer, S. & Sharan, S.K. Expression of human BRCA1 variants in mouse ES cells allows functional analysis of BRCA1 mutations. *J Clin Invest* **119**, 3160-3171 (2009).
9. Hui, A. B., *et al.* Robust global micro-RNA profiling with formalin-fixed paraffin-embedded breast cancer tissues. *Lab Invest* **89**, 597-606 (2009).
10. Iorio, M. V., *et al.* MicroRNA gene expression deregulation in human breast cancer. *Cancer Res* **65**, 7065-7070 (2005).
11. Roa, W., *et al.* Identification of a new microRNA expression profile as a potential cancer screening tool. *Clin Invest Med* **33**, E124 (2010).
12. Volinia, S., *et al.* A microRNA expression signature of human solid tumors defines cancer gene targets. *Proc Natl Acad Sci U S A* **103**, 2257-2261 (2006).
13. Hu, Y.L., Fong, S., Largman, C. & Shen, W.F. HOXA9 regulates miR-155 in hematopoietic cells. *Nucleic Acids Res.* **38**, 5472-5478 (2010)
14. Kohlhaas, S., *et al.* Cutting edge: the Foxp3 target miR-155 contributes to the development of regulatory T cells. *J Immunol* **182**, 2578-2582 (2009).

15. Kong, W., *et al.* MicroRNA-155 is regulated by the transforming growth factor beta/Smad pathway and contributes to epithelial cell plasticity by targeting RhoA. *Mol Cell Biol* **28**, 6773-6784 (2008).
16. Yarden, R. I., and Brody, L. C. BRCA1 interacts with components of the histone deacetylase complex. *Proc Natl Acad Sci U S A* **96**, 4983-4988 (1999).
17. Zheng, L., Annab, L. A., Afshari, C. A., Lee, W. H., and Boyer, T. G. BRCA1 mediates ligand-independent transcriptional repression of the estrogen receptor. *Proc Natl Acad Sci U S A* **98**, 9587-9592 (2001).
18. Cable, P.L., *et al.* Novel consensus DNA-binding sequence for BRCA1 protein complexes. *Mol Carcinog* **38**, 85-96 (2003).
